# Exploiting selection at linked sites to infer the rate and strength of adaptation

Lawrence H. Uricchio<sup>1†</sup>, Dmitri A. Petrov<sup>1</sup>, David Enard<sup>2†</sup>

<sup>1</sup>Department of Biology, Stanford University, Stanford, CA 94305

<sup>2</sup>Department of Ecology and Evolutionary Biology, University of Arizona, Tucson, AZ 85721

<sup>†</sup>To whom correspondence should be addressed: uricchio@stanford.edu, denard@email.arizona.edu

Genomic data encodes past evolutionary events and has the potential to reveal the strength, rate, and biological drivers of adaptation. However, robust estimation of adaptation rate ( $\alpha$ ) and adaptation strength remains a challenging problem because evolutionary processes such as demography, linkage, and non-neutral polymorphism can confound inference. Here, we exploit the influence of background selection to reduce the fixation rate of weakly-beneficial alleles to jointly infer the strength and rate of adaptation. We develop a novel MK-based method (ABC-MK) to infer adaptation rate and strength, and estimate  $\alpha = 0.135$  in human protein-coding sequences, 72% of which is contributed by weakly adaptive variants. We show that in this adaptation regime  $\alpha$  is reduced  $\approx 25\%$  by linkage genome-wide. Moreover, we show that virus-interacting proteins (VIPs) undergo adaptation that is both stronger and nearly twice as frequent as the genome average ( $\alpha = 0.224$ , 56% due to strongly-beneficial alleles). Our results suggest that while most adaptation in human proteins is weakly-beneficial, adaptation to viruses is often strongly-beneficial. Our method provides a robust framework for estimating adaptation rate and strength across species.

## Introduction

The relative importance of selection and drift in driving species' diversification has been a matter of debate since the origins of evolutionary biology. In Darwin and Wallace's formulations of evolutionary theory, natural selection is the predominant driver of the accumulation of differences between species (1, 2). Subsequent theorists argued that random genetic drift could be a more important contributor to differences between species (3-6), with chance differences accumulated over time due to reproductive isolation between populations. Although it is now clear that natural selection plays a substantial role in both diversification and constraint in many species (7-10), considerable uncertainty remains about the relative importance of stochastic drift, mutation, selection, and linkage, with no clear consensus among evolutionary geneticists (11-15). A better mechanistic understanding of these processes and how they jointly shape genetic diversity could help to resolve old evolutionary puzzles, such as the narrow range of observed genetic diversity across species (16) and the apparently low rate of adaptation in primates (17).

37 With the exception of rapidly evolving microbial species, most adaptation events occur too slowly to be  
38 directly observed over the timescale of a scientific study. Therefore, detailed study of the molecular basis  
39 of adaptation has required the development of computational methods to infer adaptation rate (denoted  $\alpha$ ,  
40 defined as the proportion of fixed differences between species that confer fitness benefits) directly from genetic  
41 sequence data. Most existing approaches derive from the McDonald-Kreitman (MK) test (7, 18) and related  
42 Poisson random field framework (19), both of which use divergence and polymorphism data to infer adaptation  
43 rates. Note that a recent approach uses polymorphism data alone to infer the distribution of fitness effects of  
44 fixing mutations (20). The critical idea behind each of these methods is to compare evidence for differentiation  
45 at alleles that are likely to have fitness effects (*e.g.*, nonsynonymous alleles that change protein function by  
46 altering the amino acid sequence) to alleles that are less likely to have fitness effects (*e.g.*, synonymous alleles  
47 that do not change the amino acid sequence of proteins).

48 In the classic MK framework, the rate of divergence at putatively functional sites ( $D_N$ , often defined as  
49 nonsynonymous differences within proteins) is compared to putatively neutral diverged sites ( $D_S$ , often defined  
50 as synonymous differences). Polymorphic sites within both the functional and non-functional class ( $P_N$  and  
51  $P_S$ , respectively) are used as a background to calibrate the expected rate of divergence under a neutral model.  
52 If mutations at functional sites are assumed to be either virtually lethal or neutral, then the ratio  $\frac{D_N}{D_S}$  has  
53 the same expected value as  $\frac{P_N}{P_S}$  given that virtually lethal mutations contribute to neither  $P_N$  nor  $D_N$ . When  
54  $\frac{D_N}{D_S}$  exceeds  $\frac{P_N}{P_S}$ , this is interpreted as evidence of adaptation because sites with functional effects on proteins  
55 are over-represented among the fixed differences relative to the neutral expectation. Smith and Eyre-Walker  
56 developed a simple equation that uses the same logic as the MK test to estimate adaptation rate  $\alpha$ ,

$$\alpha \approx 1 - \frac{D_S}{D_N} \frac{P_N}{P_S}, \quad (1)$$

57 and used this approach to provide evidence for a high rate of adaptation in *Drosophila* (18).

58 Unfortunately, this elegant framework is susceptible to many biases, most notably driven by the presence  
59 of weakly deleterious polymorphism in the class  $P_N$ . Deleterious polymorphism effectively makes the test  
60 overly conservative, because deleterious alleles are unlikely to ever reach fixation and therefore lead to the  
61 overestimation of the expected background rate of substitutions in the functional class. Fay *et al* introduced  
62 the idea of including only common polymorphic alleles (*e.g.*, alleles at frequency 15% or greater), which  
63 should remove many deleterious alleles (21) – however, this approach has been shown to provide conservative  
64 adaptation rate estimates in many contexts (22). More recently, Messer & Petrov showed that even removing  
65 all polymorphism below 50% is insufficient to correct this bias, especially when slightly deleterious mutations  
66 are common and the rate of adaptive evolution is high (23). In order to mitigate this effect, Messer & Petrov  
67 introduced the idea of the asymptotic MK test (aMK). In this implementation,  $\frac{P_N}{P_S}$  in eqn. 1 is replaced  
68 by  $\frac{P_N(x)}{P_S(x)}$ , where  $P_N(x)$  and  $P_S(x)$  are the number of segregating nonsynonymous and synonymous alleles  
69 at frequency  $x$ , respectively (23). An exponential curve is fit to the resulting  $\alpha(x)$  function, which can be  
70 calculated for all values of  $x$  in the interval (0,1) for a sample of sequenced chromosomes. The intercept of  
71 the best-fit exponential curve at  $x = 1$  is a good approximation for  $\alpha$ , as it effectively removes all slightly

72 deleterious polymorphism at all frequencies. This approach was shown to be robust to both the underlying  
73 distribution of deleterious effects and recent demographic events (23). aMK has inspired new approaches to  
74 inferring adaptation in mitochondrial genes (24) and revealed a high rate of adaptation in proteins interacting  
75 with pathogens (25).

76 While aMK extends the elegant MK framework for estimating adaptation rate, it does not explicitly  
77 account for the possibility that beneficial alleles contribute to segregating polymorphism. It is unknown  
78 whether aMK is robust to the presence of weakly beneficial alleles, but there is reason to believe that beneficial  
79 alleles would be problematic because they are preferentially found at very high frequencies (20), and thus their  
80 effect would not be eliminated by the asymptotic procedure. The recent emphasis on adaptation from standing  
81 variation (26–30) and reported evidence for weakly-beneficial polymorphism in *Drosophila* (31) suggest that  
82 methods to infer adaptation strength over longer evolutionary time-scales are needed.

83 A key limitation of existing MK-based approaches is that they provide estimates of adaptation rate but not  
84 adaptation strength, and therefore it is not clear whether weakly beneficial mutations contribute substantially  
85 to the fixation process. The underlying processes driving weak and strong adaptation might differ, and the  
86 ability to separately estimate rates of weak and strong adaptation could provide insight into the biological  
87 drivers of adaptation. We hypothesized that such a method could be developed by exploiting the impact of  
88 background selection (BGS) on the fixation rate of weakly-beneficial alleles. BGS removes neutral and weakly-  
89 beneficial variation via linkage to deleterious loci (32), while the fixation rate of strongly-adaptive alleles is not  
90 substantially affected (33). Given that the strength of BGS varies widely and predictably across the human  
91 genome (34), a method that interrogates the rate of adaptation as a function of BGS might be able to jointly  
92 infer the rate and strength of adaptation.

93 Here, we probe the performance of aMK when weakly-beneficial alleles substantially contribute to segre-  
94 gating polymorphism, and we show that aMK underestimates  $\alpha$  in this adaptation regime. We additionally  
95 show that when adaptation is weak, true  $\alpha$  is predicted to vary substantially across the genome as a function  
96 of the strength of BGS. We exploit this signal of covariation between  $\alpha$  and BGS in the weak-adaptation  
97 regime to develop an approximate Bayesian computation method, which we name ABC-MK, that separately  
98 infers the rate of adaptation for weakly-beneficial and strongly-beneficial alleles. Our approach and aMK  
99 rely on similar input data, but we use a model-based fitting procedure that directly accounts for BGS and  
100 weakly-beneficial alleles. We apply our method to human genetic data to provide evidence that adaptation  
101 in humans is primarily weakly-beneficial and varies as a function of BGS strength. Interestingly, adaptation  
102 rate estimates on virus-interacting proteins support a much higher rate of strong adaptation, suggesting that  
103 adaptation to viruses is both frequent and strongly fitness-increasing. We address seven potential sources of  
104 confounding, and discuss our results in light of recent research on adaptation in humans.

## 105 Results

### 106 $\alpha$ estimates are conservative for weakly-beneficial selection

107 The aMK approach is known to converge to the true  $\alpha$  at high frequency under the assumption that positively  
108 selected mutations make negligible contributions to the frequency spectrum (23). This assumption is likely  
109 to be met when beneficial alleles confer large fitness benefits, because selective sweeps occur rapidly and  
110 beneficial alleles are rarely observed as polymorphic. However, when selection is predominantly weak, attaining  
111 a substantial  $\alpha$  requires much larger mutation rates for beneficial alleles and longer average transit time to  
112 fixation, introducing the possibility that weakly-beneficial alleles will contribute non-negligibly to the frequency  
113 spectrum, even in small samples.

114 We tested the robustness of the aMK approach to the presence of weakly-beneficial alleles using simulation  
115 and theory. We simulated simultaneous negative and positive selection using model-based forward simulations  
116 under a range of scenarios (35, 36). We supposed that nonsynonymous alleles are under selection, while  
117 synonymous alleles are neutral. In each simulation, we set  $\alpha = \alpha_W + \alpha_S = 0.2$ , where  $\alpha_W$  is the component  
118 of  $\alpha$  due to weakly-beneficial mutations ( $2Ns = 10$ ) and  $\alpha_S$  represents strongly-beneficial alleles ( $2Ns = 500$ ).  
119 Note that  $\alpha$  is not treated as a parameter in the analyses herein; we use analytical theory to calculate the  
120 mutation rates for deleterious alleles and advantageous alleles that result in the desired  $\alpha$ , meaning that  $\alpha$  is  
121 a model output and not a model input. We drew deleterious selection coefficients from a Gamma distribution  
122 inferred from human sequence data (37), and we varied  $\alpha_W$  from 0 to 0.2 (Fig. 1).

123 To test whether aMK is sensitive to polymorphic weakly adaptive alleles, we used the simulated frequency  
124 spectra to estimate the rate of adaptation using published aMK software (38). When adaptation is due entirely  
125 to strongly adaptive alleles, the estimated value of  $\alpha$  ( $\hat{\alpha}$ ) was close to the true value but slightly conservative  
126 ( $\hat{\alpha} = 0.181 \pm 0.01$ ; Fig. 1A). As we increased the contribution of weakly-beneficial alleles to  $\alpha$ , estimates of  $\alpha$   
127 became increasingly conservative ( $\hat{\alpha} = 0.144 \pm 0.01$  when  $\alpha_W = 0.1$ , and  $\hat{\alpha} = 0.122 \pm 0.015$  when  $\alpha_W = 0.2$ ;  
128 Fig. 1B-C). Removing polymorphism above frequency 0.5 has been suggested as approach to account for  
129 potential biases induced by high-frequency derived alleles, which could be mispolarized in real datasets (25).  
130 Restricting to alleles below frequency 0.5 produced similar (but conservative) estimates for all three models  
131 ( $\hat{\alpha} = 0.14271, 0.14529$ , and  $0.14264$  for  $\alpha_W = 0.0, 0.1$  and  $0.2$ , respectively), likely because the frequency  
132 spectrum is not strongly dependent on the rate of weakly-beneficial mutation for low-frequency alleles. Lastly,  
133 we performed a much larger parameter sweep across  $\alpha$  values and selection coefficients. We find that  $\alpha$   
134 estimates become increasingly conservative as the proportion of weakly deleterious alleles increases, and as  
135 the strength of selection at beneficial alleles decreases (Fig. S12A & Supplemental Methods). Asymptotic-MK  
136 estimates of  $\alpha$  are only weakly dependent on the distribution of deleterious selection coefficients (Fig. S12).

137 To better understand why parameter estimates decreased as the proportion of weakly adaptive alleles  
138 increased, we performed analytical calculations of  $\alpha(x)$  using diffusion theory (39, 40). Since we use large  
139 sample sizes in our analysis herein, we replace the terms  $p_N(x)$  and  $p_S(x)$  in  $\alpha(x)$  with  $\sum_x p_N(x)$  and  $\sum_x p_S(x)$

140 in our calculations, which trivially asymptotes to the same value as the original formulation but is not strongly  
141 affected by sample size (see Supplemental Methods). We find that the downward bias in estimates of  $\alpha$  is  
142 due to segregating weakly adaptive alleles, and removing these alleles from the simulated and calculated  $\alpha(x)$   
143 curves would restore the convergence of  $\alpha(x)$  to the true  $\alpha$  at high frequency (Fig. 1A-C, red curves). In real  
144 data, it is not possible to perfectly partition positively selected and deleterious polymorphic sites. Hence, in  
145 later sections we focus on using the shape of the  $\alpha(x)$  curve to infer the strength and rate of adaptation under  
146 models that include linkage and complex demography.

## 147 **Background selection reduces true $\alpha$ when adaptation is weak**

148 We have shown that weakly-beneficial alleles may impact aMK analyses by contributing to segregating poly-  
149 morphism. This presents an opportunity to study whether aMK estimates vary as a function of background  
150 selection (BGS) strength. BGS, the action of linkage between deleterious alleles and neutral alleles, reduces  
151 genetic diversity in the human genome (34) and affects neutral divergence rates (41), and is predicted to  
152 decrease the fixation probability of weakly adaptive alleles (33). Hence, we hypothesized that if adaptation is  
153 partially driven by weakly-beneficial alleles in some species, BGS could play a role in modulating adaptation  
154 rate across the genome.

155 To better understand how BGS might affect aMK inference in the presence of weakly-beneficial alleles,  
156 we performed analytical calculations and simulations of  $\alpha(x)$  with various levels of BGS. We set  $\alpha = 0.2$  in  
157 the absence of BGS, and then performed simulations while fixing the rate of adaptive mutations and changing  
158 the amount of BGS (ranging from  $\frac{\pi}{\pi_0} = 0.4$  to 1.0, where  $\pi$  is neutral nucleotide diversity as compared to  
159 the neutral diversity in the absence of linked selection,  $\pi_0$ ). We find that when adaptation is strong, BGS  
160 has a modest effect on  $\alpha(x)$  and the true value of  $\alpha$  (Fig. 2A&C), mostly driven by an increase in the rate  
161 of fixation of deleterious alleles (Fig. S2E). When adaptation is weak, BGS removes a substantial portion of  
162 weakly adaptive alleles and precludes them from fixing, resulting in much stronger dependence of  $\alpha(x)$  on BGS  
163 and a substantial reduction in the true value of  $\alpha$  (Fig. 2B&D and Fig. S2C). Similar to the previous section,  
164 estimates of  $\alpha$  were conservative across all models, but the underestimation was much more pronounced for  
165 weak adaptation (Fig. 2C&D).

## 166 **Human adaptation rate is shaped by linked selection**

167 Our modeling results show that  $\alpha$  is likely to be underestimated when weakly-beneficial alleles contribute  
168 substantially to the frequency spectrum, and that background selection may reduce adaptation rate when  
169 fitness benefits of adaptive alleles are small. Since BGS is thought to drive broad-scale patterns of diversity  
170 across the human genome (34), we hypothesized that directly accounting for the action of BGS on adaptation  
171 rate could provide new insights into the evolutionary mechanisms driving adaptation. Moreover, the fact  
172 that weak adaptation is strongly affected by BGS while strong adaptation is not suggests that strong and  
173 weak adaptation could be differentiated in genomic data by comparing regions of differing BGS strengths

174 (from  $\frac{\pi}{\pi_0} = 0.2$  to  $\frac{\pi}{\pi_0} = 1$ ). We therefore designed a method to infer  $\alpha$  while accounting for both BGS and  
175 weakly-beneficial alleles.

176 We developed an approximate Bayesian computation (ABC) approach for estimating  $\alpha_W$  and  $\alpha_S$  in the  
177 presence of BGS and complex human demography (42). Briefly, we sample parameters from prior distributions  
178 corresponding to the shape and scale of deleterious selection coefficients (assumed to be Gamma-distributed)  
179 and the rate of mutation of weakly and strongly-beneficial mutations. We perform forward simulations (35, 36)  
180 of simultaneous negative and positive selection at a coding locus under a demographic model inferred from  
181 NHLBI Exome project African American samples (43) with varying levels of background selection from  $\pi/\pi_0 =$   
182 0.2 to  $\pi/\pi_0 = 1.0$  and the sampled parameter values. We then calculate  $\alpha(x)$  using this simulated data, sampling  
183 alleles from the simulations such that the distribution of BGS values in the simulation matches the distribution  
184 in the empirical data as calculated by a previous study (34). We use  $\alpha(x)$  values at a subset of frequencies  $x$   
185 as summary statistics in ABC (specifically, at derived allele counts 1, 2, 5, 10, 20, 50, 100, 200, 500, and 1000  
186 in a sample of 1322 chromosomes). To improve efficiency, we employ a resampling-based approach that allows  
187 us to query many parameter values using the same set of forward simulations (see Supplemental Methods).  
188 We tested our approach by estimating parameter values (population scaled mutation rates  $\theta_S$ ,  $\theta_W$ , and the  
189 parameters of a Gamma distribution controlling negative selection strength) and quantities of interest ( $\alpha_W$ ,  
190  $\alpha_S$ ,  $\alpha$ ) from simulated data. We find that the method produces high-accuracy estimates for most inferred  
191 parameters and  $\alpha$  values (including  $\alpha_W$ ,  $\alpha_S$ , and total  $\alpha$  – Fig. S6). Some parameter values (particularly  
192 those corresponding to the distribution of fitness effects (DFE) over deleterious alleles and mutation rates  
193 of beneficial alleles) were somewhat noisily inferred. We find that  $\alpha$  estimates were not very sensitive to  
194 various types of model misspecification (See Supplemental Methods – Robustness analyses), but  $\alpha_W$  and  $\alpha_S$   
195 are modestly affected by misspecification of the demographic model or the DFE of alleles driving BGS. We  
196 term our approach ABC-MK.

197 We applied ABC-MK to empirical  $\alpha(x)$  data computed from human genomes obtained from the Thousand  
198 Genomes Project (TGP) for all 661 samples with African ancestry (44). We find strong posterior support  
199 for a substantial component of  $\alpha$  driven by weakly-beneficial alleles ( $\hat{\alpha}_W = 0.097$ ; Fig. 3A & see Tab. 1 for  
200 area of 95% HPD), as well as posterior support for a smaller component of  $\alpha$  from strongly-beneficial alleles  
201 ( $\hat{\alpha}_S = 0.041$ ). We estimate that the total  $\hat{\alpha} = 0.135$ , nearly twice the estimate obtained with the same dataset  
202 using the original aMK approach ( $\hat{\alpha} = 0.076$ , see Supplemental Methods; we note that while our estimate is  
203 similar to previous estimates (23, 37), we use a much larger set of genes in our inference and hence the estimates  
204 are not directly comparable). In addition to rates of positive selection, our approach provides estimates of  
205 negative selection strength. We find support for mean strength of negative selection of  $2Ns \approx -220$  (Fig. S9C),  
206 which is consistent with recent studies using large sample sizes (45) and weaker than earlier estimates using  
207 small samples (37, 46).

208 In addition to estimating evolutionary parameters, we sought to better understand how BGS may impact  
209 adaptation rate across the genome. We resampled parameter values from our posterior estimates of each  
210 parameter, and ran a new set of forward simulations using these parameter values. We then calculated  $\alpha$  as



211 a function of BGS in our simulations. We find that  $\alpha$  co-varies strongly with BGS, with  $\alpha$  in the lowest BGS  
212 bins being 33% of  $\alpha$  in the highest bins (Fig. 3C). Integrating across the whole genome, our results suggest that  
213 human adaptation rate in coding regions is reduced by approximately 25% by BGS (Fig. S9D). To confirm  
214 that these model projections are supported by the underlying data, we split the genome into BGS bins and  
215 separately estimated adaptation rate in each bin. Although these estimates are substantially noisier than  
216 our inference on the full dataset, we find that weak adaptation rate decreases as a function of BGS strength  
217 in accordance with the model predictions (Fig. 3D). In contrast, estimates of the mean strength of negative  
218 selection against nonsynonymous mutations did not covary with BGS strength (Fig. S20). Lastly, to validate  
219 that our model recapitulates  $\alpha(x)$  values that we observe in real data, we also used our independent forward  
220 simulations to recompute  $\alpha(x)$ . We find that our model is in tight agreement with the observed data across  
221 the majority of the frequency spectrum. The model and data deviate at high frequency, but both are within  
222 the sampling uncertainty (Fig. 3B, gray envelope).

223 Previous research has shown that virus-interacting proteins (VIPs) have undergone faster rates of adapta-  
224 tion than the genome background (25). However, the strength of selection acting on these genes is unknown,  
225 and given our BGS results it is plausible that the higher rate of adaptation in VIPs is driven by lower overall  
226 background selection at VIPs rather than increased selection pressure for adaptation. In contrast, if pathogens  
227 have imposed large fitness costs on humans it is possible that VIPs would support both higher and stronger  
228 adaptation rates. We ran our method while restricting to an expanded set of 4,066 VIPs for which we had  
229 divergence and polymorphism data available. We found evidence for strikingly higher adaptation rates in  
230 VIPs than the genome background ( $\alpha = 0.224$ ) and a much larger contribution from strongly adaptive alleles  
231 ( $\alpha_S = 0.126$ ; Fig. 4). The higher  $\alpha$  for VIPs cannot be explained by BGS, because VIPs undergo slightly  
232 stronger BGS than average genes; the mean BGS strength at VIPs is 0.574, as compared to 0.629 for all genes  
233 (in units of  $\pi/\pi_0$ ). Taking  $\alpha_S = 0.126$  as a point estimate for the rate of strongly-beneficial substitutions in  
234 VIPs and  $\alpha_S = 0.041$  genome-wide, we estimate that 61% of all strongly-beneficial substitutions occurred in  
235 VIPs (Tab. 1). Moreover, we estimate that the posterior probability that  $\alpha$  is greater in VIPs than non-VIPs  
236 is 99.97%, while the posterior probability that  $\alpha_S$  is greater in VIPs is 88.9% (Fig. 4C). Bootstrap samples  
237 of non-VIPs (1,000 replicates) never resulted in  $\alpha_S$  estimates as high as those obtained from VIPs (Fig. S19).  
238 These results are concordant with the  $\alpha(x)$  summary statistics for VIPs, which had larger values at high  
239 frequency alleles than non-VIPs (Fig. 4D). Interestingly,  $\alpha(x)$  is lower for VIPs at low frequency, suggesting  
240 increased overall levels of conservation among VIPs (see also Fig. S9, where we find support for stronger  
241 negative selection against nonsynonymous mutations in VIPs).

## 242 Discussion

243 A long-running debate in evolutionary biology has concerned the relative importance of drift and selection in  
244 determining the rate of diversification between species (3, 4, 6, 14). While previous studies have shown that  
245 there is a substantial signal of adaptation in *Drosophila* (18), estimates of adaptation rate in humans are

246 much lower (14). Here, we extended the classic MK framework to account for weakly-beneficial alleles, and  
247 we provided evidence for a large rate of weakly adaptive mutation in humans. We showed that a state-of-  
248 the-art approach to adaptation rate estimation that does not account for beneficial polymorphism provides  
249 conservative estimates of  $\alpha$  ( $\hat{\alpha} = 0.076$  for this data) (23), while our method nearly doubles the estimated  
250 human adaptation rate (to  $\hat{\alpha} = 0.135$ ). Most of the adaptation signal that we detect is due to weakly-  
251 beneficial alleles. Interestingly, virus-interacting proteins supported a much higher rate of adaptation than  
252 the genome background ( $\hat{\alpha} = 0.226$ ), especially for strongly-beneficial substitutions ( $\hat{\alpha}_S = 0.126$  as compared  
253 to  $\hat{\alpha}_S = 0.041$  genome-wide). Our results provide an evolutionary mechanism that partially explains the  
254 apparently low observed rate of human adaptation in previous studies, and extends the support for viruses as  
255 a major driver of adaptation in humans (25).

256 It has long been known that recombination could in principle affect the evolutionary trajectories of both  
257 beneficial and deleterious alleles (33, 47, 48), and studies in *Drosophila* (49, 50) and dogs (51) have provided  
258 evidence for the effect of recombination on divergence and load. Despite the expectation that recombination  
259 could have a strong effect on adaptation in humans, studies have differed on how recombination affects human  
260 divergence and polymorphism. One human genomic study explored the ratio  $\frac{D_N}{D_S}$  as a function of recombination  
261 rate, and found no evidence for an effect of recombination on divergence rate (11). Our results may partially  
262 explain why  $\frac{D_N}{D_S}$  does not fully capture the effect of recombination on divergence in humans. As BGS increases  
263 in strength, the rate of accumulation of deleterious alleles increases, while the rate of fixation of weakly  
264 adaptive alleles decreases. The two effects partially offset each other, which should reduce the sensitivity of  
265  $\frac{D_N}{D_S}$  as a tool to detect the effect of recombination on divergence. A more recent study provided evidence that  
266 recombination affects the accumulation of deleterious polymorphic alleles (52), but did not provide detailed  
267 information about the effect of recombination on adaptation. Our results are consistent with the idea that  
268 weakly deleterious alleles are predicted to segregate at higher frequencies in regions under strong BGS, and  
269 we additionally show that BGS affects the accumulation of weakly-beneficial alleles in humans.

270 While classic MK approaches estimate only the rate of adaptation, our method extends the MK-framework  
271 to provide information about both the rate and strength of selection. Previous approaches to estimating the  
272 strength of adaptation have focused on the dip in diversity near sweeping alleles (31, 49, 53–55) or have directly  
273 inferred the DFE from the frequency spectrum (20) – our approach capitalizes on an orthogonal signal of the  
274 reduction in fixation rate of weakly-beneficial alleles induced by selection at linked sites. We developed an ABC  
275 method to capture this signal, but less computationally intensive methods could also be used – for example,  
276 the original aMK approach could be applied in bins of BGS strength. If a substantial proportion of adaptation  
277 is due to weakly-beneficial alleles, such an analysis should result in a strong correlation between BGS strength  
278 and (potentially conservative)  $\alpha$  estimates. However, it should be noted that cryptic covariation between gene  
279 functions (such as VIPs) and BGS strength could confound such inferences.

280 We supposed that the main effects of linked selection in humans were due to background selection, but in  
281 principle genetic draft could drive similar patterns. Draft is expected to substantially reduce genetic diversity  
282 when sweeps occur frequently, and can impede the fixation of linked beneficial alleles (56, 57). Previous work



283 has also shown that strong draft can alter the fixation rate and frequency spectra of neutral and deleterious  
284 alleles (23). We performed simulations of strong draft in 1MB flanking sequences surrounding a gene evolving  
285 under natural selection and tested the magnitude of the deviation from theoretical predictions under a model of  
286 background selection alone. Consistent with previous work, we observe that draft increases the fixation rate of  
287 deleterious alleles and thereby decreases  $\alpha$  (23). However, the effect on  $\alpha(x)$  is only modest at the frequencies  
288 that we use in our inference procedure (*i.e.*, below 75%), even when the strength and rate of positive selection  
289 are much larger than we and others have inferred in humans (although there is a modest deviation around  
290 75% frequency, the highest frequency we use in our inference; Fig. S4C&D). This implies that draft due to  
291 selected sites outside genes would have to be much stronger than draft due to positive selection inside exons in  
292 order to drive the effects that we infer in the human genome. We note that it is likely that species undergoing  
293 both strong, frequent sweeps and BGS (*e.g.*, *Drosophila* – see (31)), draft will contribute to the removal of  
294 weakly-beneficial polymorphism.

295 Selection has left many imprints on the human genome, with studies reporting signatures of selective  
296 sweeps (55), soft sweeps (29), background selection (34), negative selection (37, 46), and polygenic adapta-  
297 tion (28). Still, considerable uncertainty remains about the relative importance of these evolutionary mech-  
298 anisms, especially as concerns the rate and strength of positive selection. Recent work has suggested that  
299 the contrasting adaptation rate estimates of previous studies (54, 55) can be reconciled by arguing that most  
300 adaptation signals in humans are consistent with adaptation from standing variation (29). Our results show  
301 that the frequency spectra and patterns of divergence are also consistent with the idea that many adaptive  
302 alleles segregate much longer than is expected for a classic sweep, and hence also help to reconcile the results  
303 of previous studies.

304 In addition to determining the rate, strength, and mechanisms of adaptation, there is an ongoing effort  
305 to find the biological processes most important for driving adaptation. Previous work has shown that viruses  
306 are a critical driver of adaptation in mammals (25), but the strength of the fitness advantages associated with  
307 resistance to (or tolerance of) infection remain unclear. Our approach clarifies that adaptation to viruses is  
308 also approximately three-fold enriched for virus-interacting genes. In contrast, weak adaptation rate was not  
309 substantially different between VIPs and non-VIPs, suggesting that weak adaptation may proceed through  
310 mechanisms that are shared across proteins regardless of function (for example, optimization of stability).  
311 While we have focused on VIPs here due to the expected fitness burdens associated with infection, in future  
312 research our approach could be used to investigate adaptation in any group of genes, or extended to partition  
313 genes into strong and weak adaptation classes.

314 The model that we fit to human data does an excellent job of recapitulating the observed patterns in  
315 the Thousand Genomes Project data, but we were concerned that several possible confounding factors could  
316 influence our results. We showed that seven confounding factors (ancestral mispolarization (58), demographic  
317 model misspecification (59, 60), BGS model misspecification, covariation of BGS and sequence conservation,  
318 GC-biased gene conversion (61), selection on synonymous alleles (62), and misspecification of strongly- and/or  
319 weakly-beneficial selection coefficients) are unlikely to substantially influence the results (see Supplemental

320 Methods), but it should be noted that the adaptive process in our model is exceedingly simple, and it is  
321 very likely that the evolutionary processes driving diversification are much more complex. We supposed that  
322 adaptation proceeds in two categories, weak and strong selection, each of which is described by a single selection  
323 coefficient. In reality, adaptive alleles are likely to have selection coefficients drawn from a broad distribution,  
324 and adaptation is likely to proceed by a variety of mechanisms, including sweeps (55), polygenic adaptation  
325 (28), and selection from standing variation (29). While our results show that BGS shapes adaptation rate  
326 across the genome, our method does not differentiate among adaptation mechanisms. We expect that future  
327 research will further clarify the relative importance of various selection mechanisms to shaping genomic patterns  
328 of diversity in the genomes of humans and other organisms (10, 63).

329 Our method is flexible, and as with the original aMK approach, we showed that the  $\alpha$  estimates obtained  
330 are only minimally affected by demographic uncertainty. It may therefore be an effective tool for providing  
331 more accurate estimates of adaptation rate in non-model species that have not been the subject of detailed  
332 genomic studies. Despite recent progress, the evolutionary mechanisms that drive the range of diversities  
333 observed across species (which could include linked selection, population size, and/or population demography)  
334 remain the subject of debate (12, 13, 16). Future work using and extending our method, which provides more  
335 accurate estimates of adaptation rate when weakly-beneficial alleles contribute substantially to polymorphism,  
336 could help to resolve this open question.

## 337 Acknowledgments

338 We thank Philipp Messer, Raul Torres, Ying Zhen, Christian Huber, Kirk Lohmueller, Zachary Szpiech, Adam  
339 Siepel, Yifei Huang, Hussein Hijazi, and our anonymous reviewers for comments that improved the manuscript.  
340 We thank Alan Aw, Noah Rosenberg, and members of the Rosenberg lab for helpful discussions. LHU was  
341 partially supported by and IRACDA fellowship through NIGMS grant K12GM088033, as well as NIH R01  
342 HG005855 and NSF DBI-1458059 (each to Noah Rosenberg). We thank the Stanford/SJSU IRACDA program  
343 for support.

## 344 References

- 345 1. Darwin C. On the origin of species. Murray; 1859.
- 346 2. Wallace AR. Darwinism: an exposition of the theory of natural selection with some of its applications.  
347 MacMillan & Co; 1889.
- 348 3. Wright S. On the roles of directed and random changes in gene frequency in the genetics of populations.  
349 Evolution. 1948;2(4):279–294.
- 350 4. Kimura M, et al. Evolutionary rate at the molecular level. Nature. 1968;217(5129):624–626.
- 351 5. Ohta T. Slightly deleterious mutant substitutions in evolution. Nature. 1973;246(5428):96.
- 352 6. Kimura M. Preponderance of synonymous changes as evidence for the neutral theory of molecular evolu-  
353 tion. Nature. 1977;267(5608):275.
- 354 7. McDonald JH, Kreitman M. Adaptive protein evolution at the ADH locus in *Drosophila*. Nature.  
355 1991;351(6328):652.
- 356 8. Fay JC, Wyckoff GJ, Wu CI. Testing the neutral theory of molecular evolution with genomic data from  
357 *Drosophila*. Nature. 2002;415(6875):1024.
- 358 9. Pollard KS, Hubisz MJ, Rosenbloom KR, Siepel A. Detection of nonneutral substitution rates on mam-  
359 malian phylogenies. Genome Research. 2010;20(1):110–121.
- 360 10. Charlesworth B, Charlesworth D. Neutral variation in the context of selection. Molecular Biology and  
361 Evolution. 2018;35(6):1359–1361.
- 362 11. Bullaughey KL, Przeworski M, Coop G. No effect of recombination on the efficacy of natural selection in  
363 primates. Genome Research. 2008;18:544–554.
- 364 12. Corbett-Detig RB, Hartl DL, Sackton TB. Natural selection constrains neutral diversity across a wide  
365 range of species. PLoS Biology. 2015;13(4):e1002112.
- 366 13. Coop G. Does linked selection explain the narrow range of genetic diversity across species? bioRxiv.  
367 2016;doi:<https://doi.org/10.1101/042598>.
- 368 14. Kern AD, Hahn MW. The neutral theory in light of natural selection. Molecular Biology and Evolution.  
369 2018;35:1366–1371.
- 370 15. Jensen JD, Payseur BA, Stephan W, Aquadro CF, Lynch M, Charlesworth D, et al. The importance of the  
371 neutral theory in 1968 and 50 years on: a response to Kern and Hahn 2018. Evolution. 2018;73:111–114.
- 372 16. Leffler EM, Bullaughey K, Matute DR, Meyer WK, Segurel L, Venkat A, et al. Revisiting an old riddle:  
373 what determines genetic diversity levels within species? PLoS Biology. 2012;10(9):e1001388.
- 374 17. Galtier N. Adaptive protein evolution in animals and the effective population size hypothesis. PLoS  
375 Genetics. 2016;12(1):e1005774.
- 376 18. Smith NG, Eyre-Walker A. Adaptive protein evolution in *Drosophila*. Nature. 2002;415(6875):1022.
- 377 19. Sawyer SA, Hartl DL. Population genetics of polymorphism and divergence. Genetics. 1992;132(4):1161–  
378 1176.
- 379 20. Tataru P, Mollion M, Glémin S, Bataillon T. Inference of distribution of fitness effects and proportion of  
380 adaptive substitutions from polymorphism data. Genetics. 2017;207(3):1103–1119.
- 381 21. Fay JC, Wyckoff GJ, Wu CI. Positive and negative selection on the human genome. Genetics.  
382 2001;158(3):1227–1234.
- 383 22. Eyre-Walker A, Keightley PD. Estimating the rate of adaptive molecular evolution in the pres-  
384 ence of slightly deleterious mutations and population size change. Molecular Biology and Evolution.  
385 2009;26(9):2097–2108.
- 386 23. Messer PW, Petrov DA. Frequent adaptation and the McDonald–Kreitman test. Proceedings of the  
387 National Academy of Sciences. 2013;110(21):8615–8620.

- 388 24. James JE, Piganeau G, Eyre-Walker A. The rate of adaptive evolution in animal mitochondria. *Molecular*  
389 *Ecology*. 2016;25(1):67–78.
- 390 25. Enard D, Cai L, Gwennap C, Petrov DA. Viruses are a dominant driver of protein adaptation in mammals.  
391 *eLife*. 2016;5:e12469.
- 392 26. Pritchard JK, Pickrell JK, Coop G. The genetics of human adaptation: hard sweeps, soft sweeps, and  
393 polygenic adaptation. *Current Biology*. 2010;20(4):R208–R215.
- 394 27. Messer PW, Petrov DA. Population genomics of rapid adaptation by soft selective sweeps. *Trends in*  
395 *Ecology & Evolution*. 2013;28(11):659–669.
- 396 28. Berg JJ, Coop G. A population genetic signal of polygenic adaptation. *PLoS Genetics*.  
397 2014;10(8):e1004412.
- 398 29. Schrider DR, Kern AD. Soft sweeps are the dominant mode of adaptation in the human genome. *Molecular*  
399 *Biology and Evolution*. 2017;34(8):1863–1877.
- 400 30. Uricchio LH, Kitano HC, Gusev A, Zaitlen NA. An evolutionary compass for detecting signals of polygenic  
401 selection and mutational bias. *Evolution Letters*. 2019;*to appear*.
- 402 31. Elyashiv E, Sattath S, Hu TT, Strutsovsky A, McVicker G, Andolfatto P, et al. A genomic map of the  
403 effects of linked selection in *Drosophila*. *PLoS Genetics*. 2016;12(8):e1006130.
- 404 32. Charlesworth B, Morgan M, Charlesworth D. The effect of deleterious mutations on neutral molecular  
405 variation. *Genetics*. 1993;134(4):1289–1303.
- 406 33. Barton NH. Linkage and the limits to natural selection. *Genetics*. 1995;140(2):821–841.
- 407 34. McVicker G, Gordon D, Davis C, Green P. Widespread genomic signatures of natural selection in hominid  
408 evolution. *PLoS Genetics*. 2009;5(5):e1000471.
- 409 35. Hernandez RD, Uricchio LH. SFS\_CODE: more efficient and flexible forward simulations. *bioRxiv*.  
410 2015;doi:<https://doi.org/10.1101/025064>.
- 411 36. Uricchio LH, Torres R, Witte JS, Hernandez RD. Population genetic simulations of complex phenotypes  
412 with implications for rare variant association tests. *Genetic Epidemiology*. 2015;39(1):35–44.
- 413 37. Boyko AR, Williamson SH, Indap AR, Degenhardt JD, Hernandez RD, Lohmueller KE, et al. Assessing  
414 the evolutionary impact of amino acid mutations in the human genome. *PLoS Genet*. 2008;4(5):e1000083.
- 415 38. Haller BC, Messer PW. asymptoticmk: A web-based tool for the asymptotic McDonald–Kreitman test.  
416 *G3: Genes, Genomes, Genetics*. 2017;7(5):1569–1575.
- 417 39. Evans SN, Shvets Y, Slatkin M. Non-equilibrium theory of the allele frequency spectrum. *Theoretical*  
418 *Population Biology*. 2007;71(1):109–119.
- 419 40. Kimura M. Diffusion models in population genetics. *Journal of Applied Probability*. 1964;1(2):177–232.
- 420 41. Phung TN, Huber CD, Lohmueller KE. Determining the effect of natural selection on linked neutral  
421 divergence across species. *PLoS Genetics*. 2016;12(8):e1006199.
- 422 42. Beaumont MA, Zhang W, Balding DJ. Approximate Bayesian computation in population genetics. *Ge-*  
423 *netics*. 2002;162(4):2025–2035.
- 424 43. Tennessen JA, Bigham AW, OConnor TD, Fu W, Kenny EE, Gravel S, et al. Evolution and functional  
425 impact of rare coding variation from deep sequencing of human exomes. *Science*. 2012;337(6090):64–69.
- 426 44. Consortium TGP, et al. A global reference for human genetic variation. *Nature*. 2015;526(7571):68.
- 427 45. Kim BY, Huber CD, Lohmueller KE. Inference of the distribution of selection coefficients for new non-  
428 synonymous mutations using large samples. *Genetics*. 2017;206(1):345–361.
- 429 46. Eyre-Walker A, Woolfit M, Phelps T. The distribution of fitness effects of new deleterious amino acid  
430 mutations in humans. *Genetics*. 2006;173(2):891–900.
- 431 47. Hill WG, Robertson A. The effect of linkage on limits to artificial selection. *Genetics Research*.  
432 1966;8(3):269–294.

- 433 48. Smith JM, Haigh J. The hitch-hiking effect of a favourable gene. *Genetics Research*. 1974;23(1):23–35.
- 434 49. Macpherson JM, Sella G, Davis JC, Petrov DA. Genomewide spatial correspondence between nonsyn-  
435 onymous divergence and neutral polymorphism reveals extensive adaptation in *Drosophila*. *Genetics*.  
436 2007;177(4):2083–2099.
- 437 50. Castellano D, Coronado-Zamora M, Campos JL, Barbadilla A, Eyre-Walker A. Adaptive evolution is  
438 substantially impeded by Hill–Robertson interference in drosophila. *Molecular Biology and Evolution*.  
439 2015;33(2):442–455.
- 440 51. Marsden CD, Ortega-Del Vecchyo D, OBrien DP, Taylor JF, Ramirez O, Vilà C, et al. Bottlenecks and  
441 selective sweeps during domestication have increased deleterious genetic variation in dogs. *Proceedings of*  
442 *the National Academy of Sciences*. 2016;113(1):152–157.
- 443 52. Hussin JG, Hodgkinson A, Idaghdour Y, Grenier JC, Goulet JP, Gbeha E, et al. Recombination affects  
444 accumulation of damaging and disease-associated mutations in human populations. *Nature Genetics*.  
445 2015;47(4):400.
- 446 53. Jensen JD, Thornton KR, Andolfatto P. An approximate Bayesian estimator suggests strong, recurrent  
447 selective sweeps in *Drosophila*. *PLoS Genetics*. 2008;4(9):e1000198.
- 448 54. Hernandez RD, Kelley JL, Elyashiv E, Melton SC, Auton A, McVean G, et al. Classic selective sweeps  
449 were rare in recent human evolution. *Science*. 2011;331(6019):920–924.
- 450 55. Enard D, Messer PW, Petrov DA. Genome-wide signals of positive selection in human evolution. *Genome*  
451 *Research*. 2014;24(6):885–895.
- 452 56. Comeron JM, Kreitman M. Population, evolutionary and genomic consequences of interference selection.  
453 *Genetics*. 2002;161(1):389–410.
- 454 57. Uricchio LH, Hernandez RD. Robust forward simulations of recurrent hitchhiking. *Genetics*.  
455 2014;197(1):221–236.
- 456 58. Hernandez RD, Williamson SH, Bustamante CD. Context dependence, ancestral misidentification, and  
457 spurious signatures of natural selection. *Molecular Biology and Evolution*. 2007;24(8):1792–1800.
- 458 59. Ewing GB, Jensen JD. The consequences of not accounting for background selection in demographic  
459 inference. *Molecular Ecology*. 2016;25(1):135–141.
- 460 60. Torres R, Szpiech ZA, Hernandez RD. Human demographic history has amplified the effects of background  
461 selection across the genome. *PLoS Genetics*. 2018;14(6):e1007387.
- 462 61. Ratnakumar A, Mousset S, Glémin S, Berglund J, Galtier N, Duret L, et al. Detecting positive selection  
463 within genomes: the problem of biased gene conversion. *Philosophical Transactions of the Royal Society*  
464 *of London B: Biological Sciences*. 2010;365(1552):2571–2580.
- 465 62. Huang YF, Siepel A. Estimation of allele-specific fitness effects across human protein-coding sequences  
466 and implications for disease. *bioRxiv*. 2018;doi:<https://doi.org/10.1101/441337>.
- 467 63. Huber CD, Kim BY, Marsden CD, Lohmueller KE. Determining the factors driving selective effects of new  
468 nonsynonymous mutations. *Proceedings of the National Academy of Sciences*. 2017;114(17):4465–4470.
- 469 64. Charlesworth J, Eyre-Walker A. The McDonald–Kreitman test and slightly deleterious mutations. *Molec-*  
470 *ular Biology and Evolution*. 2008;25(6):1007–1015.
- 471 65. Eyre-Walker A. Changing effective population size and the McDonald-Kreitman test. *Genetics*.  
472 2002;162(4):2017–2024.
- 473 66. Eyre-Walker A. Genetic architecture of a complex trait and its implications for fitness and genome-wide  
474 association studies. *Proceedings of the National Academy of Sciences*. 2010;107(suppl 1):1752–1756.
- 475 67. Charlesworth B. The effect of background selection against deleterious mutations on weakly selected,  
476 linked variants. *Genetical Research*. 1994;63(03):213–227.
- 477 68. Hudson RR, Kaplan NL. Deleterious background selection with recombination. *Genetics*.  
478 1995;141(4):1605–1617.

- 479 69. Nordborg M, Charlesworth B, Charlesworth D. The effect of recombination on background selection.  
480 *Genetical Research*. 1996;67(02):159–174.
- 481 70. Nicolaisen LE, Desai MM. Distortions in genealogies due to purifying selection. *Molecular Biology and*  
482 *Evolution*. 2013;195(1):221–230.
- 483 71. Yates A, Akanni W, Amode MR, Barrell D, Billis K, Carvalho-Silva D, et al. Ensembl 2016. *Nucleic Acids*  
484 *Research*. 2015;44(D1):D710–D716.
- 485 72. Kent WJ. BLAT – the BLAST-like alignment tool. *Genome Research*. 2002;12(4):656–664.
- 486 73. Löytynoja A, Goldman N. webPRANK: a phylogeny-aware multiple sequence aligner with interactive  
487 alignment browser. *BMC Bioinformatics*. 2010;11(1):579.
- 488 74. Enard D, Petrov DA. Evidence that RNA viruses drove adaptive introgression between neanderthals and  
489 modern humans. *Cell*. 2018;175(2):360–371.
- 490 75. Williamson SH, Hernandez R, Fledel-Alon A, Zhu L, Nielsen R, Bustamante CD. Simultaneous inference  
491 of selection and population growth from patterns of variation in the human genome. *Proceedings of the*  
492 *National Academy of Sciences*. 2005;102(22):7882–7887.
- 493 76. Gutenkunst RN, Hernandez RD, Williamson SH, Bustamante CD. Inferring the joint demographic history  
494 of multiple populations from multidimensional SNP frequency data. *PLoS Genetics*. 2009;5(10):e1000695.
- 495 77. Živković D, Steinrücken M, Song YS, Stephan W. Transition densities and sample frequency spectra of  
496 diffusion processes with selection and variable population size. *Genetics*. 2015;200(2):601–617.
- 497 78. Uricchio LH, Zaitlen NA, Ye CJ, Witte JS, Hernandez RD. Selection and explosive growth alter genetic  
498 architecture and hamper the detection of causal rare variants. *Genome Research*. 2016;26(7):863–873.
- 499 79. Jewett EM, Steinrücken M, Song YS. The effects of population size histories on estimates of selection  
500 coefficients from time-series genetic data. *Molecular Biology and Evolution*. 2016;33(11):3002–3027.
- 501 80. Thornton KR. Automating approximate Bayesian computation by local linear regression. *BMC Genetics*.  
502 2009;10(1):35.
- 503 81. Cooper GM, Stone EA, Asimenos G, Green ED, Batzoglu S, Sidow A. Distribution and intensity of  
504 constraint in mammalian genomic sequence. *Genome Research*. 2005;15(7):901–913.
- 505 82. Teshima KM, Coop G, Przeworski M. How reliable are empirical genomic scans for selective sweeps?  
506 *Genome Research*. 2006;16(6):702–712.
- 507 83. Schrider DR, Shanku AG, Kern AD. Effects of linked selective sweeps on demographic inference and  
508 model selection. *Genetics*. 2016;204(3):1207–1223.
- 509 84. Rousselle M, Mollion M, Nabholz B, Bataillon T, Galtier N. Overestimation of the adaptive substitution  
510 rate in fluctuating populations. *Biology Letters*. 2018;14(5):20180055.
- 511 85. Gravel S, Henn BM, Gutenkunst RN, Indap AR, Marth GT, Clark AG, et al. Demographic history  
512 and rare allele sharing among human populations. *Proceedings of the National Academy of Sciences*.  
513 2011;108(29):11983–11988.
- 514 86. Torgerson DG, Boyko AR, Hernandez RD, Indap A, Hu X, White TJ, et al. Evolutionary processes acting  
515 on candidate cis-regulatory regions in humans inferred from patterns of polymorphism and divergence.  
516 *PLoS Genetics*. 2009;5(8):e1000592.
- 517 87. Duret L, Galtier N. Biased gene conversion and the evolution of mammalian genomic landscapes. *Annual*  
518 *Review of Genomics and Human Genetics*. 2009;10:285–311.
- 519 88. Racimo F, Schraiber JG. Approximation to the distribution of fitness effects across functional categories  
520 in human segregating polymorphisms. *PLoS Genetics*. 2014;10(11):e1004697.
- 521 89. Gazave E, Ma L, Chang D, Coventry A, Gao F, Muzny D, et al. Neutral genomic regions refine models of  
522 recent rapid human population growth. *Proceedings of the National Academy of Sciences*. 2014;111(2):757–  
523 762.



## 524 Figures

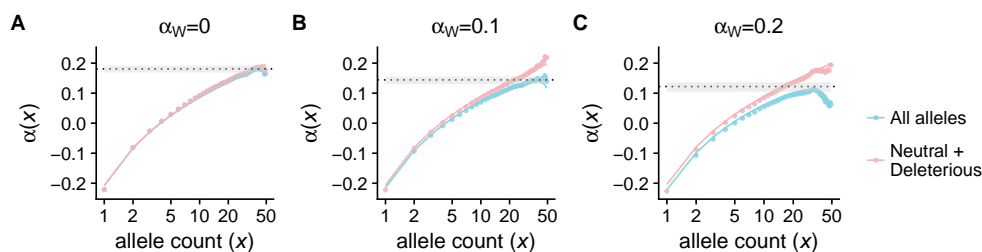

Figure 1: A-C: We plot  $\alpha(x)$  as a function of allele count  $x$  in a sample of 50 chromosomes. The true value of  $\alpha = 0.2$  in each panel, with varying contributions from weakly ( $2Ns = 10$ ) and strongly adaptive alleles ( $2Ns = 500$ ). The solid lines show the results of our analytical approximation (eqn. 11), while the points show the value of  $\alpha(x)$  from forward simulations. The blue points and curves show the calculation as applied to all polymorphic loci, while in the pink points and curves we have removed positively selected alleles from the calculation. The dotted line shows the estimated value of  $\alpha$  from the simulated data using existing asymptotic-MK methods (23, 38), while the gray bars show the 95% confidence interval around the estimate.

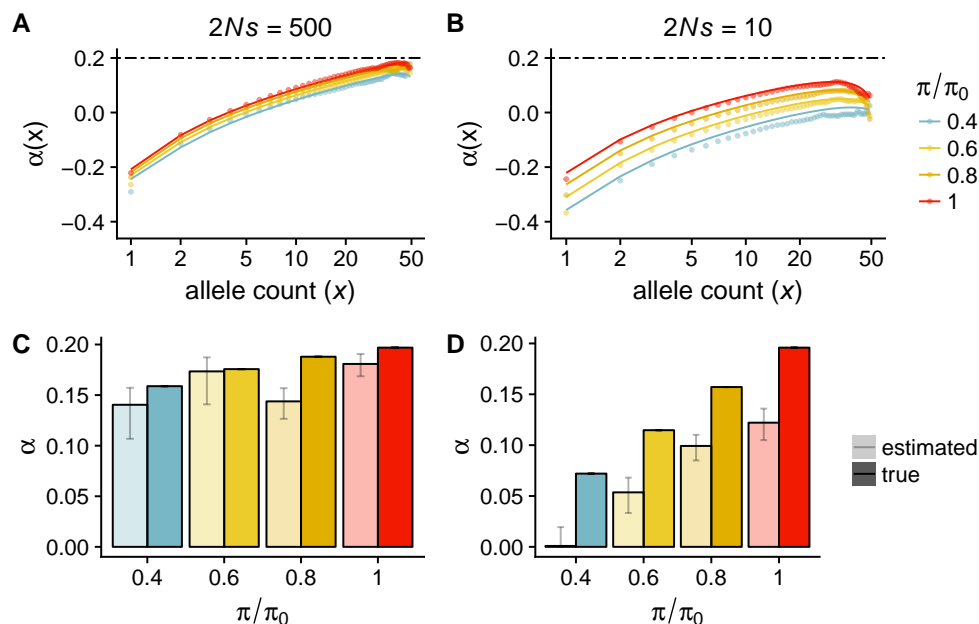

Figure 2: A-B:  $\alpha(x)$  is plotted for various background selection ( $\pi/\pi_0$ ) values. In A, adaptive alleles are strongly-beneficial ( $2Ns = 500$ ), while in B they are weakly-beneficial ( $2Ns = 10$ ). The lines represent analytical approximations, while the points represent the results of stochastic simulations. The dashed lines at  $\alpha = 0.2$  represent the true rate of adaptation in the absence of BGS. C-D: True (dark colors) and estimated (light colors)  $\alpha$  for each of the corresponding models in A-B. Panel C corresponds to strong adaptation ( $2Ns = 500$ ) while D corresponds to weak adaptation ( $2Ns = 10$ ). Estimates of  $\alpha$  were made using existing asymptotic-MK software (38). For each parameter combination, we used  $2 \times 10^5$  independent simulations of  $10^3$  coding base pairs each.

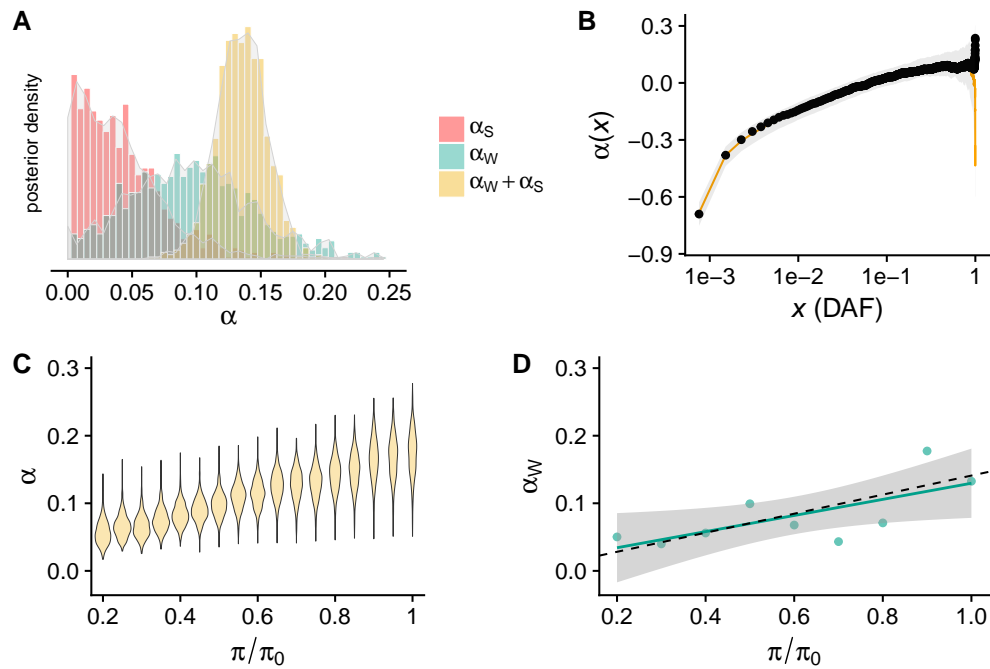

Figure 3: A: Posterior distribution of  $\alpha_W$ ,  $\alpha_S$ , and  $\alpha = \alpha_S + \alpha_W$  as inferred by applying our ABC approach to 661 samples of African ancestry from the TGP phase 3. B:  $\alpha(x)$  for genomic data (black points) plotted along with the mean posterior estimate from our model (orange line) and 99% confidence interval (gray envelope), as obtained by an independent set of simulations using the posterior parameter estimates. C: Inferred posterior distribution of  $\alpha$  as a function of BGS strength in the human genome. D: Mean posterior estimates of  $\alpha_W$ , as determined by separately fitting the model to alleles from each independent background selection strength bin. A linear model fit to the data (green line) supported statistically significant covariation between  $\pi/\pi_0$  and  $\alpha_W$  ( $p$ -value=0.0343). The black dashed line shows the predicted change in  $\alpha_W$  as a function of  $B$  given the mean estimate of  $\alpha_W$ .

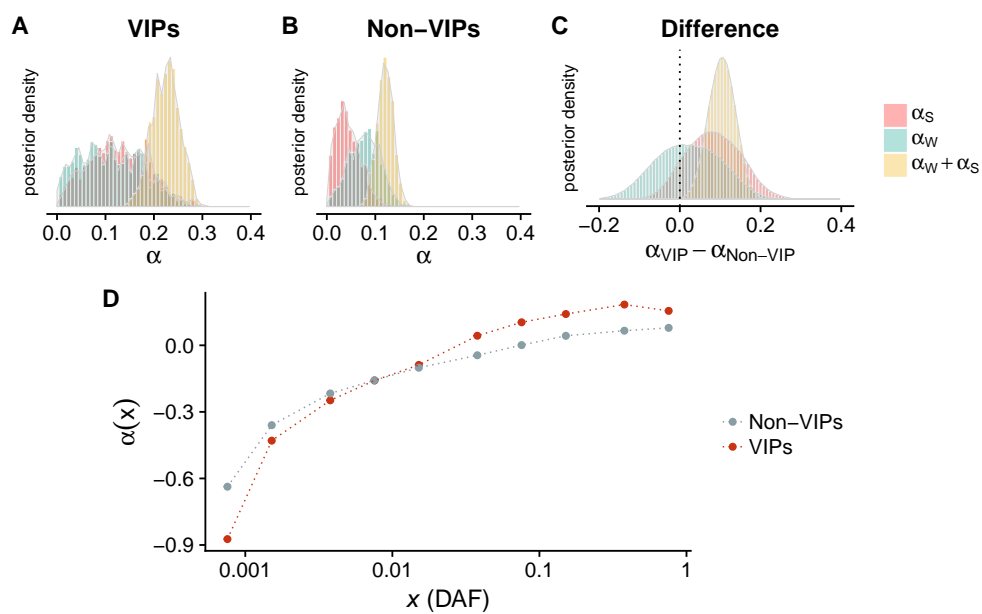

Figure 4: A: Posterior distributions for  $\alpha$ ,  $\alpha_W$ , and  $\alpha_S$  for virus-interacting proteins (VIPs, 4,066 genes). B: The same quantities for non-VIPs (12,962 genes). C: The posterior distribution of the difference in  $\alpha$  for VIPs and non-VIPs. D:  $\alpha(x)$  for VIPs and non-VIPs as a function of derived allele frequency  $x$ , specifically at the values of  $x$  that we use for statistical inference.

| Datasets & inferred adaptation rates |           |            |                    |                   |                    |
|--------------------------------------|-----------|------------|--------------------|-------------------|--------------------|
| <b>Dataset</b>                       | <b>NS</b> | <b>SYN</b> | $\hat{\alpha}$     | $\hat{\alpha}_W$  | $\hat{\alpha}_S$   |
| Whole-exome                          | 29925     | 38135      | 0.135 (0.096,0.17) | 0.097 (0.0,0.21)  | 0.041 (0.0,0.13)   |
| VIPs                                 | 6249      | 10309      | 0.224 (0.17,0.28)  | 0.098 (0.0,0.24)  | 0.126 (0.018,0.26) |
| Non-VIPs                             | 23676     | 27826      | 0.12 (0.09,0.15)   | 0.077 (0.01,0.13) | 0.042 (0.0, 0.09)  |

Table 1: Table of datasets and inferred values for total adaptation rate ( $\alpha$ ), weak adaptation ( $\alpha_W$ ) and strong adaptation ( $\alpha_S$ ). Estimated  $\alpha$  values represent the mean of the posterior distribution. NS represents the number of nonsynonymous fixations and SYN represents the number of synonymous fixations. Values in parentheses represent the area of 95% highest posterior density.

## 525 Supplementary Methods

### 526 Model

527 We apply a classic directional selection model in which new alleles have selection coefficients  $s$  drawn from  
528 some distribution over  $s$ . New mutations arise at rate  $\theta = 4N\mu$ , and mutations that are synonymous are  
529 treated as neutral whereas nonsynonymous mutations are beneficial or deleterious.

530 Our ultimate goal is to construct an estimator that jointly infers the rate of adaptation (captured by  $\alpha$ ,  
531 which is defined to be the proportion of substitutions that are adaptive) and the strength of selection (*i.e.*,  
532 the distribution of  $2Ns$  values over functional sites). It will be instructive to begin by reviewing the results  
533 of Messer & Petrov (23), who developed a novel estimator for  $\alpha$ . Subsequently, we extend their results using  
534 analytical theory and simulations to capture information about the strength of selection.

535 Following earlier work (18, 23), we let  $d_N$  be the substitution *rate* and we replace  $N$  in the subscript  
536 with  $N_+$ ,  $N_-$ , or  $N_0$  to indicate advantageous, deleterious, or neutral non-synonymous substitutions. When  
537  $d_N$  alone appears, it denotes the total rate for all nonsynonymous variants (*i.e.*  $d_N = d_{N_-} + d_{N_+} + d_{N_0}$ ).  
538 Analogously,  $d_S$  is the substitution rate for synonymous variants, which are assumed to be neutral (and hence  
539 do not have additional subscripts).

540 Consider now the proportion of functional sites that are fixed by positive selection,  $\alpha$ .

$$\alpha \equiv \frac{d_{N_+}}{d_N} = \frac{d_N - (d_{N_-} + d_{N_0})}{d_N}. \quad (2)$$

541 Rearranging, we have

$$\alpha = 1 - \frac{d_{N_-} + d_{N_0}}{d_N} = 1 - \frac{d_S}{d_N} \frac{(d_{N_-} + d_{N_0})}{d_S}. \quad (3)$$

542 Let the number of observed substitutions be denoted  $D$ . As noted by (23),  $\frac{d_S}{d_N}$  can be estimated from  
543 sequence alignments by taking the ratio of  $D_S$  and  $D_N$ , under the assumption that the observed number of  
544 substitutions is proportional to the rate. However, the ratio  $(d_{N_-} + d_{N_0})/d_S$  is not straightforward to estimate,  
545 because the numerator relies on classifying substituted sites by their fitness effects. However, under the as-  
546 sumption that polymorphic sites are rarely selected (because deleterious sites are removed from the population  
547 quickly and advantageous sites go to fixation rapidly),

$$\frac{d_{N_-} + d_{N_0}}{d_S} \approx \frac{P_N}{P_S}, \quad (4)$$

548 and hence

$$\alpha \approx 1 - \frac{D_S}{D_N} \frac{P_N}{P_S}. \quad (5)$$

### 549 Assumptions of the MK framework

550 Approx. 4 implicitly assumes that selected polymorphism is rarely observed. In reality, it is likely that  
551 moderately deleterious alleles sometimes contribute substantially to observed polymorphism, especially at  
552 low frequency. To guard against this possibility, we can then modify eqn. 5 as

$$\alpha(x) \approx 1 - \frac{D_S}{D_N} \frac{P_N(x)}{P_S(x)}. \quad (6)$$

553 where  $P_N(x)$  and  $P_S(x)$  are all non-synonymous polymorphism above frequency  $x$  and all synonymous poly-  
554 morphism above frequency  $x$ , respectively. We note that the original asymptotic-MK approach takes  $P_N(x)$   
555 and  $P_S(x)$  as the number of polymorphic sites *at* frequency  $x$  rather than above  $x$ , but this approach scales  
556 poorly as sample size increases since most common allele frequencies  $x$  have very few polymorphic sites in  
557 large samples. We therefore define  $P_N(x)$  and  $P_S(x)$  as stated above since these quantities trivially have the  
558 same asymptote but are less affected by changing sample size.

559 It has been noted that many studies have selected a fixed frequency threshold (say,  $x = 0.15$ ), and removed  
560 all polymorphisms below this threshold (64). However, if moderately deleterious sites segregate above  $x$ , then  
561 the fixation rate approximation  $\pi_{N_-} \approx \pi_{N_0}$  is not valid, and  $\alpha(x)$  will be downwardly biased (64).



562 Messer & Petrov (23) observed that as the frequency threshold  $x$  is increased to be asymptotically close  
 563 to 1, eqn. 6 asymptotes to the true value of  $\alpha$ . Intuitively, this is because weakly deleterious alleles (*e.g.*,  
 564  $2Ns = -1$ ) can rise to appreciable frequency, but have substantially different fixation probability than neutral  
 565 sites at all frequencies, meaning that approximation 4 may be poor for all values of derived allele frequency  
 566  $x$  that are substantially less than 1. However, as  $x$  is increased to be arbitrarily close to the absorbing state  
 567 at  $x = 1$ , eqn. 6 approaches the true value of  $\alpha$  because the probability that a site increases to frequency  
 568  $x = 1 - \delta$  is a good approximation to the probability that a site fixes for very small values of  $\delta$ .

569 In most sequencing experiments, there are very few segregating sites with derived allele frequencies close  
 570 to 1, so simply taking the highest possible value of the threshold frequency  $x$  results in a very noisy estimator.  
 571 Hence, Messer & Petrov suggested taking all possible thresholds  $x$  and fitting an exponential curve to  $\alpha(x)$  (23).  
 572 They showed that when selection is strong, this results in accurate estimates of the adaptation rate  $\alpha$ .

## 573 Analytical approximation to $\alpha(x)$

574 While the results of Messer & Petrov account for weakly deleterious polymorphic sites, they do not account  
 575 for the possibility of weakly advantageous sites contributing to  $P_N$  (23). Here, we use analytical theory to  
 576 investigate the quality of the approximation in eqn. 6 when adaptation is weak but occurs at an appreciable  
 577 rate, such that positively selected mutations occur frequently but fix only rarely. In this section, we assume  
 578 that the population has constant size, and relax this assumption later with ABC. The calculations in this  
 579 section proceed similarly to those in previous studies (22, 65).

580 First, we note that while  $\mathbb{E}[\alpha(x)] = 1 - \mathbb{E}\left[\frac{D_S}{D_N} \frac{P_N}{P_S}\right]$  is not straightforward to calculate, the expectation  
 581 of each quantity on the RHS of eqn. 6 (*i.e.*,  $P_N, P_S, D_N, D_S$ ) is easily calculated from first principles using  
 582 diffusion theory (40). Therefore, we make the first-order approximation

$$\mathbb{E}[\alpha(x)] = 1 - \mathbb{E}\left[\frac{D_S}{D_N} \frac{P_N}{P_S}\right] \approx 1 - \frac{\mathbb{E}[D_S] \mathbb{E}[P_N]}{\mathbb{E}[D_N] \mathbb{E}[P_S]}. \quad (7)$$

583 Denoting the distribution of selection coefficients over new mutations as  $\mu_s$  (multiplied by the underlying  
 584 mutation rate) and the fixation probability as  $\pi_s$ , the expected number of substitutions along a branch of time  
 585  $T$  in a locus of length  $L$  is simply

$$\mathbb{E}[D] = LTd = LT \int_s 2N\mu_s\pi_s ds. \quad (8)$$

586 Note that for neutral mutations, where  $\mu_s$  is non-zero only for  $s = 0$  and the fixation probability is given by  
 587  $\frac{1}{2N}$ ,  $\int_s 2N\mu_s\pi_s ds$  reduces to  $2N\mu_0 \times \frac{1}{2N} = \mu_0$ .

588 Likewise, the expected number of polymorphisms above frequency  $x$  can be calculated from the standard  
 589 diffusion theory for the site frequency spectrum (39), given by

$$f(x) = \int_s \theta_s \frac{1}{x(1-x)} \frac{e^{4Ns}(1 - e^{-4Ns(1-x)})}{e^{4Ns} - 1} ds, \quad (9)$$

590 where  $\theta_s = 4N\mu_s$  is the mutation rate for sites with selection coefficient  $s$ . We have assumed that there is  
 591 no dominance (note that this assumption can be relaxed, but for simplicity we consider only genic selection  
 592 herein). In a finite sample of  $2n$  chromosomes, we must convolute eqn. 9 with the binomial to obtain the  
 593 downsampled frequency distribution. We denote the convoluted frequency spectrum as  $f_B(x)$ , defined as the  
 594 expected proportion of polymorphic sites with allele count equal to  $x$  in a fixed sample, and note that the  
 595 total number of polymorphic sites  $P(x)$  in a sample is given by

$$\mathbb{E}[P(x)] = \sum_{x^*=x}^{x^*=1} f_B(x^*). \quad (10)$$

596 Hence, we can substitute eqns. 8 and 10 into eqn. 6 for  $\alpha(x)$  to make theoretical predictions about the  
 597 shape of  $\alpha(x)$  as a function of model parameters.

$$\alpha(x) \approx 1 - \frac{p_0\mu}{(1-p_0) \int_s 2N\mu_s\pi_s ds} \frac{\sum_x^1 (1-p_0)f_{B_N}(x^*)}{\sum_x^1 p_0 f_{B_S}(x^*)}, \quad (11)$$

598 where  $f_{B_S}(x^*)$  and  $f_{B_N}(x^*)$  are the downsampled site frequency spectra for synonymous and nonsynonymous  
599 alleles, respectively, and  $p_0$  is the probability that a polymorphic site is synonymous (*i.e.*, assumed to be  
600 neutral). We developed software that calculates eqn. 11 explicitly for the case of a Gamma distribution of  
601 selection coefficients (see next section).

## 602 Gamma distributed selection coefficients

603 While the previous section did not assume a functional form for the distribution of selection coefficients, in  
604 order to perform simulations and inference we supposed that deleterious selection coefficients were Gamma-  
605 distributed. Gamma distributions have previously been shown to provide a good fit to human polymorphism  
606 data, and have revealed that most nonsynonymous alleles are weakly deleterious, with a long tail of strongly  
607 deleterious variation (37, 46). Additionally, we suppose that advantageous alleles are either strong or weak,  
608 such that they are drawn from a point mass distribution with two values ( $s_W$  and  $s_S$ , where  $W$  and  $S$  indicate  
609 Weak and Strong).

610 Replacing  $\theta_s = 4N\mu_s$  in eqns. 7-8 with a Gamma distribution  $\Gamma[\alpha, \beta]$  over selection coefficients (where we  
611 have ignored the underlying mutation rate constant, which ultimately cancels out in our calculations), we find  
612 that

$$\mathbb{E}[D] = \mathbb{E}[D_+] + \mathbb{E}[D_-] + \mathbb{E}[D_0] =$$
$$LT \left( p_+ (1 - e^{-2s}) + p_- (2^{-\alpha} \beta^\alpha (-\zeta \left[ \alpha, \frac{2+\beta}{2} \right] + \zeta \left[ \alpha, 1/2(2 - \frac{1}{N} + \beta) \right])) + (1 - p_- - p_+) \frac{1}{2N} \right), \quad (12)$$

613 where  $p_+$  is the probability that an allele is deleterious and  $p_-$  is the probability that it is deleterious, and  $\zeta$   
614 is the Riemann Zeta function. The frequency spectra for Gamma distributions of deleterious effects have been  
615 previously investigated (66).

## 616 Using asymptotic-MK to infer $\alpha$

617 We used the method of Messer & Petrov (23) to infer  $\alpha$  from the simulated data presented in Fig. 1. This  
618 method fits an exponential curve to  $\alpha(x)$  and takes the value of the best-fitting exponential function at  $x = 1$  as  
619 the inferred value of  $\alpha$ . In all three panels of Fig. 1, the true rate of adaptation as observed in the simulations  
620 is  $\alpha = 0.2$ , but the component of  $\alpha$  that consists of weakly adaptive substitutions ( $\alpha_W$ ) varies from 0 to 0.2  
621 (*i.e.*, when  $\alpha_W = 0.2$ , all adaptive substitutions are weakly adaptive). To infer  $\alpha$ , we used published software  
622 implementing this method (38). The inferred  $\alpha$  is plotted as a black dotted line in Fig. 1, while the 95%  
623 confidence interval is plotted as a gray bar.

624 We used the default setting for the frequency threshold as provided by the software (38), which removes  
625 all alleles below minor allele frequency of 10%. When inputting the frequency spectrum for all 661 individuals,  
626 we obtained negative estimates of  $\alpha$ , presumably because there are very few alleles per bin at high frequency  
627 in large samples which induces numerical instability. We therefore binned the frequency spectrum into 5%  
628 frequency bins in performing the analysis, which resulted in a more stable fit.

629 In addition to using the previously published software, we also implemented asymptotic-MK in R using the  
630 function `nls` (nonlinear least squares). We fit a curve of the form  $\alpha(x) = a + be^{cx}$  to alleles between  $x = 0.1$   
631 and  $x = 0.9$  (*i.e.*, the same default range of frequencies used in the previously published software (38)). We  
632 applied this fitting procedure to predicted  $\alpha(x)$  curves using our analytical approximations. We find that  $\alpha$  is  
633 strongly under-estimated when adaptation is due to weakly-beneficial alleles (Fig. S12A). This result is largely  
634 insensitive to the distribution of deleterious alleles – decreasing the mean strength of selection on deleterious  
635 alleles did not substantially change the performance of the estimation procedure (Fig. S12B-C). Removing  
636 beneficial polymorphism from the frequency spectrum essentially fixes this problem (Fig. S12D-E). Of course,  
637 it is not possible to remove the beneficial polymorphisms in real data.

## 638 Background selection & adaptive divergence

639 Background selection, the action of linked deleterious alleles on patterns of genetic diversity (67–69), may also  
640 alter the adaptive process. Linked selection reduces the effective population size and hence increases the rate

of drift of neutral loci, and may also reduce the efficacy of selection on deleterious alleles and alter fixation rates of both deleterious and positively selected alleles (33).

We investigated the impact of background selection on  $\alpha$  and  $\alpha(x)$  using analytical theory and simulations. We focus on a model in which a coding locus is flanked by loci of length  $L$  containing deleterious alleles with population-scaled selection coefficient  $-2Nt$  undergoing persistent deleterious mutation at rate  $4N\mu_-$ . The flanking loci recombine at rate  $r$  per-base, per-generation. The diversity at the coding locus is decreased relative to its neutral expectation by

$$\frac{\pi}{\pi_0} \approx e^{\frac{-4\mu_-L}{2rL+t}} \quad (13)$$

as derived previously (68, 69).

The effects of background selection on  $d_N$ ,  $d_S$ , the frequency spectrum, and effective population size have been the subject of much theoretical work (33, 67, 70). It was shown previously (33) that the probability of fixation of a positively selected allele under background selection is reduced by a factor  $\phi$ , with

$$\phi(t, s) = e^{\left[ \frac{-2\mu}{t \left( 1 + \frac{rL}{t} + \frac{2s}{t} \right)} \right]} \quad (14)$$

Multiplying across all deleterious linked sites, we find that

$$\Phi = \prod_1^L \phi(t, s) = e^{\frac{-2t\mu \left( \Psi \left[ 1, \frac{r+2s+t}{r} \right] - \Psi \left[ 1, \frac{r(L+1)+2s+t}{r} \right] \right)}{r^2}}, \quad (15)$$

where  $\Phi$  is the total reduction in fixation probability and  $\Psi$  is the polygamma function.

## Testing the analytical theory with simulations

We rigorously tested the theoretical calculations herein using stochastic simulations (35). Fig. S1 reports results of background selection simulations, and shows that for a range of expected background selection values calculated with eqn. 13, the expected diversity is in close agreement with values of nucleotide diversity obtained in forward simulations. In our simulations, we solve eqn. 13 for the desired mutation rate in order to obtain the desired reduction in diversity.

We also show that the predicted frequency spectra for positively selected, negatively selected, and neutral alleles are all in close agreement with simulations (Fig. S3), as are the number of diverged sites for neutral ( $\Lambda_0$ ), deleterious ( $\Lambda_-$ ), and beneficial deleterious ( $\Lambda_+$ ) alleles (Fig. S2). Note that the curves in Figs. S2&S3 represent analytical approximations using the results derived herein, and not fits to the data. For these simulations, we assumed that  $\alpha = 0.2$ , and that the Gamma distribution of deleterious effects is given by a values previously inferred from human nonsynonymous polymorphism with  $a = 0.184$  and  $b = 0.000402$  (37). We relax these assumptions in later sections when performing inference. Python software for performing these calculations and building SFS\_CODE command lines is available <https://github.com/uricchio/mktest>.

## Divergence and polymorphism data

We retrieved the number of polymorphic sites and their allele frequencies in human coding sequences as well as the number of human-specific fixed substitutions in coding sequences since divergence with chimpanzees. Fixed substitutions were identified by parsimony based on alignments of human (hg19 assembly), chimpanzee (panTro4 assembly) and orangutan (ponAbe2 assembly) coding sequences. Human coding sequences from Ensembl v73 (71) were blatted (72) on the panTro4 and ponAbe2 assemblies and the best corresponding hits were blatted back on the hg19 human assembly to finally identify human-chimp-orangutan best reciprocal orthologous hits. We used the Blatfine option to ensure that even short exons at the edge of coding sequences would be included in the hits. We further used a Blat protein -minIdentity threshold of 60%. The corresponding human, chimp and orangutan coding sequences were then aligned with PRANKs coding sequence evolution model (73) after codons containing undefined positions were removed.

For each human coding gene in Ensembl we considered all possible protein- coding isoforms and aligned separately each isoform between human, chimp and orangutan. The numbers of polymorphic or divergent sites are therefore the numbers over all possible isoforms of a human gene (however the same polymorphic or

682 divergent site present in multiple isoforms still counts for one). If a polymorphic or divergent site was synony-  
683 mous in an isoform but non-synonymous in another isoform, it counted as one non-synonymous polymorphic  
684 or divergent site. Only fixed divergent sites were included, meaning that substitutions still polymorphic in hu-  
685 mans were not counted as divergent. The derived allele frequency of polymorphic sites is the frequency across  
686 all African populations from the Thousand Genomes Project phase 3 (TGP), which comprises 661 individuals  
687 spread across seven different subpopulations (44). Allele frequencies were extracted from vcf files provided  
688 by the TGP for the phase 3 data. In total, 17,740 human-chimp-orangutan orthologs were included in the  
689 analysis. Supplemental Data Table S1 provides the number of synonymous and non-synonymous polymorphic  
690 or divergent sites for each of these 17,740 orthologs, as well as the allelic frequencies of the polymorphic sites.  
691 Polymorphic sites were counted only if they overlapped those parts of human coding sequences that were  
692 aligned with chimp and orangutan coding sequences. The ancestral and derived allele frequencies were based  
693 on the ancestral alleles inferred by the TGP phase 3 and available in the previously mentioned vcf files (44).

694 Columns in Supplemental Data Table S1 are as follows: First column – Ensembl coding gene ID. Second  
695 column – number of non-synonymous polymorphic sites. Third column – respective derived allele frequencies of  
696 these sites separated by commas. Fourth column – number of synonymous polymorphic sites. Fifth column –  
697 respective frequencies derived allele frequencies of these sites. Sixth column – number of fixed non-synonymous  
698 substitutions on the human branch. Seventh column – number of fixed synonymous substitutions on the human  
699 branch.

700 The supplemental table, along with the data that we used to parameterize our model, is available online  
701 at <https://github.com/uricchio/mktest>.

## 702 Background selection data & identifying VIPs

703 We obtained estimates of background selection strength across the human genome from previous work (34) at  
704 <http://www.phrap.org/othersoftware.html>. Since our genetic data was reported in hg19 coordinates, we  
705 then used the liftover utility in the UCSC Genome Browser to convert the background selection coordinates  
706 from hg18 to hg19 (<https://genome.ucsc.edu/cgi-bin/hgLiftOver>). We were able to map 17,028 of the 17,740  
707 orthologs to background selection scores. This final set of 17,028 was used throughout the analyses reported  
708 in the paper. We classified virus-interacting proteins by using a previously determined set of 4,066 VIPs (74).

## 709 Estimating $\alpha$ with ABC

### 710 Motivation for performing ABC

711 Although we could use analytical theory developed herein to estimate  $\alpha$ , it is well known that demography  
712 also impacts the frequency spectrum of selected alleles (75, 76). Some of the impact of recent demography may  
713 be attenuated by using the ratio of nonsynonymous to synonymous alleles for inference (since both categories  
714 of sites will be affected (23)), but failure to incorporate both selection and demography in general can distort  
715 inference of both selection and demography (75). Since it is not straightforward to calculate the frequency  
716 spectrum under generalized models of selection, demography, and linkage (77–79), we instead use Approximate  
717 Bayesian Computation (ABC) (42) to infer selection parameters while accounting for recent demography.

### 718 Generic ABC algorithm

719 ABC proceeds by first sampling parameter values from prior distributions, next simulating model outcomes us-  
720 ing these parameter values and calculating informative summary statistics, and lastly comparing the simulated  
721 summary statistics to observed data. The parameter values that produce summary statistics that best match  
722 the observed data form an approximate posterior distribution. An additional linear model can be imposed to  
723 correct for the non-0 distance between the simulated and observed summary statistics (42, 80).

724 Here, we follow this generic approach exactly. The main sources of innovation in our method are 1)  
725 selecting summary statistics that are informative for estimating  $\alpha$  values, 2) simulating summary statistics  
726 across a range of BGS strengths corresponding to the inferred distribution of BGS strengths in the human  
727 genomic dataset, and 3) employing a resampling-based strategy for generating summary statistics that avoids  
728 simulating the full model for different parameter combinations.

## 729 Overview of our ABC approach

730 Our ABC approach proceeds in three main steps. First, we run forward simulations with a fixed DFE over  
731 nonsynonymous alleles (37), a known demography inferred from human genomic samples, and a fixed DFE  
732 over deleterious alleles flanking the central coding locus. Second, we used biased resampling of alleles from  
733 these simulations to calculate summary statistics that correspond to a wide range of nonsynonymous allele  
734 DFEs with varying rates of adaptation and exactly the same number of sampled variants and distribution  
735 of  $B$  scores as the observed data (where  $B$  is the strength of BGS from a previous study (34)). Lastly, we  
736 supply  $10^6$  sets of summary statistics sampled from our prior distributions into a published ABC software  
737 framework (80) to infer parameters from real datasets. Below we describe each of these steps in more detail.

738 We simulate a sample of 661 individuals (the same number of samples as the African continental group  
739 in the TGP phase 3 data) under a demographic model incorporating an expansion in the African ancestral  
740 population and recent exponential growth (43). Within each coding region, we suppose that the distribution  
741 of deleterious effects is given by a Gamma-distribution with  $a_0 = 0.184$ ,  $b_0 = 0.000402$ , which were previously  
742 inferred as the strength of negative selection in another study using human coding sequences (37) (note that  
743 the mean strength of negative selection is given by  $\frac{a_0}{b_0} = -457$ , but the distribution is very heavy-tailed  
744 with a substantial contribution from weakly deleterious variants). SFS\_CODE simulates sequences under the  
745 explicit 64-codon genetic code – using this model, approximately 75% of new mutations in coding regions are  
746 nonsynonymous. We additionally simulate positive selection with  $\theta_W = 7.8 \times 10^{-6}$  for weak adaptation and  
747  $\theta_S = 2.6 \times 10^{-7}$  for strong adaptation (see below for rationale on selecting these values).

748 We repeated these simulations over a range of background selection strengths, from  $\frac{\pi}{\pi_0} = 0.2$  to  $\frac{\pi}{\pi_0} = 1.0$   
749 in increments of 0.05. Each simulation replicate consists of a central coding locus of  $10^3$  bp flanked on each  
750 side by  $2 \times 10^5$  bp of non-coding loci. We use eqn. 13 to compute the mutation rate for deleterious alleles in  
751 the flanking sequences such that the desired reduction in diversity is obtained. We simulate  $10^5$  genes of  $10^3$   
752 bp in length, for  $10^8$  total bp of sequence for each BGS value.

753 We seek to infer four parameters, which we draw from prior distributions – in particular,  $\theta_W = 4N\mu_W$ , the  
754 mutation rate for weakly-beneficial alleles,  $\theta_S = 4N\mu_S$ , the mutation rate for strongly-beneficial alleles, and  $a$   
755 and  $b$ , the parameters of the Gamma distribution controlling the distribution of deleterious alleles. Since each  
756 of these parameters are fixed in our original round of simulations, we resample alleles from the simulated data to  
757 reflect the desired combination of selection parameters (see below for resampling details). Using the resampled  
758 frequency spectra,  $D_N$ , and  $D_S$ , we calculate  $\alpha(y)$  for values of  $y$  in 1, 2, 4, 5, 10, 20, 50, 200, 500, 1000, where  
759  $y$  is the derived allele count and the frequency  $x$  in  $\alpha(x)$  is given by  $x = y/2 \times 661$ . Lastly, a linear model is  
760 imposed to correct for the non-0 distance between the summary statistic values in the simulations as compared  
761 to the observed data. We use previously published software to perform this inference step (80).

762 We additionally infer the  $\alpha$  values ( $\alpha$ ,  $\alpha_W$ , and  $\alpha_S$ ) – while these are not parameters of the model, they  
763 can be inferred in the same ABC framework since they can easily be calculated for any given parameter  
764 combination. As priors, we suppose that  $\theta_W$  is uniform on  $[0, 7.8 \times 10^{-6}]$  and  $\theta_S$  is uniform on  $[0, 2.6 \times 10^{-7}]$ .  
765 We chose these values because at the top of the range,  $\alpha_W = 0.4$  and  $\alpha_S = 0.4$  when the distribution of  
766 deleterious effects is given by a Gamma distribution with  $a_0 = 0.184$ ,  $b_0 = 0.000402$ , which were previously  
767 inferred in another study using human coding sequences (37). We supposed that  $a$  and  $b$  might deviate from  
768 their previously inferred values by up to a factor of 4 above or below their previous estimates, and hence we  
769 sampled exponents  $a_{\text{fac}}$  and  $b_{\text{fac}}$  uniformly on  $[-2, 2]$  and we let  $a = a_0 2^{a_{\text{fac}}}$  and  $b = b_0 2^{b_{\text{fac}}}$ . Hence our prior for  
770  $a$  and  $b$  are centered at  $a_0$  and  $b_0$ , but can vary to allow substantial flexibility in the distribution of deleterious  
771 effects. In all of our simulations, we suppose that strongly advantageous alleles have  $2Ns = 500$  and weakly  
772 advantageous alleles have  $2Ns = 10$ , and we rescale the simulated ancestral population size to  $N = 500$ . We  
773 use a large  $s$  approximation for calculating the fixation probability of strongly advantageous alleles by treating  
774 the adaptive allele trajectory as a Galton-Watson process (57).

775 Code that we used to simulate these models is available at <https://github.com/uricchio/mktest>. Note  
776 that we designed this software to run on the Stanford HPC cluster, Sherlock – adapting it to run in other  
777 computing environments would require further modifications. We suggest that parties interested in using the  
778 software contact the authors for assistance in installing it and applying it.

## 779 Resampled summary statistics & validation

780 We resampled polymorphic sites from our set of forward simulations with  $a = a_0$ ,  $b = b_0$ ,  $\theta_W = 7.8 \times 10^{-6}$ , and  
781  $\theta_S = 2.6 \times 10^{-7}$  to compute summary statistics for ABC. The underlying idea of these resampling simulations



782 is that given a fixed strength of BGS, the allele frequency spectrum can be approximated by selecting alleles in  
783 proportion to their mutation rate given the model parameters relative to the parameter values that were used  
784 in the original set of simulations. For example, if we suppose that alleles with  $s = 0.001$  have a mutation rate  
785 of  $\theta = 10^{-5}$  in the original forward simulations but  $\theta = 10^{-6}$  in the resampling simulations, then we resample  
786 such alleles at a rate that is 10% of their representation in the original simulations.

787 For polymorphic positively selected sites, we resample with replacement from the simulated frequency  
788 spectra by selecting adaptive polymorphic sites with probability proportional to  $\frac{\theta_w}{7.8 \times 10^{-6}}$  and  $\frac{\theta_s}{2.6 \times 10^{-7}}$  for  
789 weakly and strongly-beneficial alleles, respectively. We resample negatively selected alleles with replacement  
790 from the frequency spectrum, but we adjust the sampling probability in proportion to the probability that a  
791 polymorphic site with selection coefficient  $s$  is observed at frequency  $x$  given the parameter values  $a$  and  $b$  using  
792 the analytical expressions developed in the previous sections. We also analogously adjust the simulated number  
793 of fixation events at nonsynonymous along the simulated branch. We confirmed that our resampling-based  
794 approach provides the appropriate frequency spectra by comparing simulated resampled frequency spectra to  
795 forward simulations performed in SFS\_CODE for a subset of parameter values at the boundary of our prior  
796 distributions (Fig. S11).

797 To capture the impact of background selection, we ran the original forward simulations with varying  
798 amounts of BGS in 5% bins ranging from  $\frac{\pi}{\pi_0} = 0.2$  to  $\frac{\pi}{\pi_0} = 1.0$  and the same parameter values as above. To  
799 calculate summary statistics corresponding to the desired parameter values, for each allele in our TGP dataset  
800 we obtained an estimate of BGS strength at the corresponding locus ( $\beta_4$ ) and we sampled a polymorphic allele  
801 randomly from the frequency spectrum of the simulated BGS bin that is closest to the observed value. We  
802 excluded all sites with  $B < 175$  (i.e.,  $\frac{\pi}{\pi_0} < 0.175$ ) from the inference for computational efficiency, because sim-  
803 ulating large reductions in diversity requires high mutation rates of deleterious alleles in the flanking sequences.  
804 We pool all of the simulated polymorphic sites to calculate the  $\alpha(x)$  summary statistics corresponding to the  
805 model parameters. Open source software implementing our approach is available by request and will be posted  
806 online.

807 We tested our ABC approach by simulating a large dataset of parameter values and matched summary  
808 statistics, and then masking a subset of the parameter values. We tested our ability to infer the masked  
809 parameter values using the remaining summary statistics for 100,000 replicates. We plot the results of this  
810 experiment in Fig. S6, where we summarize the inferred parameter value as the mean of the posterior dis-  
811 tribution. We find that the method returns accurate and unbiased estimates for most quantities of interest,  
812 although we find that the parameter  $b$  controlling the distribution of deleterious effects is somewhat noisily  
813 estimated.

## 814 Summary of robustness analyses

815 Although our model explains the observed  $\alpha(x)$  data very well, we were concerned that several possible con-  
816 founders might also produce similar patterns. We focused on seven sources of confounding, namely 1) ancestral  
817 state uncertainty, 2) covariation of BGS and sequence conservation, 3) demographic model misspecification, 4)  
818 misspecification of the strength of selection at sites driving background selection, 5) biased gene conversion, 6)  
819 selection acting on synonymous alleles, and 7) misspecification of the strength of selection at adaptive variants.

820 Ancestral mispolarization could confound our results if some loci with high-frequency derived alleles in  
821 our dataset are in fact loci with low frequency derived alleles. Mispolarization can have similar effects on  
822 the frequency spectrum as positive selection, and has been identified as a possible source of bias in selection  
823 inference (58). To limit the effects of ancestral state uncertainty on our analysis, we only use the summary  
824 statistics used in our ABC to frequencies at or below 75%, which are much less susceptible to the effects of  
825 mispolarization (58). Our results are therefore unlikely to be affected by mispolarization.

826 Covariation between BGS and sequence conservation could also be a potential source of bias in our ap-  
827 proach. If negative selection is stronger per site in genes under strong BGS, then the frequency spectrum and  
828 rate of fixation of weakly deleterious alleles will also vary as a function of BGS strength (denoted  $B$  – note that  
829 a large  $B$  corresponds to weak BGS), potentially confounding our results. To test the hypothesis that sequence  
830 conservation and  $B$  covary, we computed the average “rejected substitution” score ( $RS$ , as determined by the  
831 GERP algorithm (81)) on a gene-by-gene basis as a function of  $B$ .  $RS$  scores represent the number of substi-  
832 tutions per site that have been rejected due to negative selection, and increase with the strength of negative  
833 selection. We found a slight negative correlation between  $B$  and  $RS$ , almost entirely driven by genes with  
834  $B > 875$  (Fig. S10). While this correlation is consistent with our model (since we expect more substitutions



835 due to weak adaptation in regions with low BGS), it could also be due to the confounding covariation. To  
836 eliminate the potential confounding effect of covariation between  $B$  and sequence conservation, we repeated  
837 our ABC-based inference procedure after removing all genes with  $B > 875$  from the analysis. If our signal  
838 were driven by this covariation rather than a true effect of weakly advantageous alleles, we would expect our  
839 parameter estimates to change substantially in this experiment, in particular by increasing the mean strength  
840 of selection against deleterious nonsynonymous alleles. In contrast, we observe almost no change in the esti-  
841 mated negative selection parameters (Fig. S9), and when we estimated negative selection strength separately  
842 for each BGS bin, we did not observe any covariation with  $B$  (Fig. S20).

843 Another possible confounder is demographic model misspecification. Selection and population demography  
844 both affect the frequency spectrum, and hence failure to accurately account for both demography and selection  
845 in inference procedures can result in biases (59, 60, 75, 82–84). Although the aMK framework may avoid  
846 some of these issues by directly comparing nonsynonymous and synonymous alleles (23), both of which are  
847 subject to the same demography, we nonetheless tested for demographic biases. To test the effects of model  
848 misspecification, we varied the size of the expansion event in the African ancestral population by sampling  
849 parameter values from the 95% confidence interval of a previous demographic model (85) that was built using  
850 TGP sequences (see Supplemental Methods). We simulated under these models with larger or smaller than  
851 expected bottlenecks, and used summary statistics of our “misspecified” model to perform inference of the  
852 selection parameters. We find that  $\alpha$  is still inferred very accurately, although a subset of simulations resulted  
853 in over-estimates of  $\alpha$  when the true expansion was much larger or much smaller than the expected expansion  
854 (Figs. S7&S8). We also observed modest biases in  $\alpha_W$  and  $\alpha_S$ , with  $\alpha_W$  under-estimated when the magnitude  
855 of the expansion is over-estimated and over-estimated when the expansion is under-estimated (Fig. S7&S8),  
856 but the vast majority of inferred total  $\alpha$  values fell close to the diagonal in both cases. These results suggest  
857 that our main results are robust to recent demographic uncertainty, although slight quantitative biases in  $\alpha_W$   
858 and  $\alpha_S$  could be induced by demographic model misspecification.

859 Misspecification of the strength of selection acting on alleles driving BGS could also cause bias in our  
860 inferences. We supposed that the mean strength of selection against alleles inducing BGS was  $\gamma = 2Ns = -83$ ,  
861 which reflects a mixture of previous estimates of the strength of selection against polymorphism in human  
862 coding (37) and conserved non-coding (86), weighted by the percentage of the genome that is composed of  
863 each type of element. If the true strength of selection driving BGS was much smaller or much larger, we might  
864 change the expected dependency of  $\alpha(x)$  on  $B$ . In essence, if  $\gamma$  is closer to 0, BGS should have a smaller effect  
865 on the fixation rate of weakly-beneficial alleles. We therefore considered a range of  $\gamma$  values from -10 to -100  
866 – consistent with expectations, we find that weaker selection against BGS alleles induces  $\alpha(x)$  to vary less  
867 markedly as a function of BGS strength, but the effect is very modest (Fig. S13).

868 To further address the possibility that misspecification of the BGS DFE could affect our results, we also  
869 repeated our entire inference pipeline with three additional distributions of fitness effects for the BGS alleles (a  
870 weak DFE with  $2Ns = -10$ , a strong DFE with  $2Ns = -500$ , and a gamma-distributed DFE that mixes strong  
871 and weak alleles as inferred by Boyko *et al* (37) – see Fig. S14). These varying DFEs had almost no effect on  
872 the inferred value of  $\alpha$ , but note that the gamma DFE resulted in slightly lower estimates of  $\alpha_W$  but slightly  
873 higher estimates of  $\alpha_S$ . Accordingly, we conclude that our results are not strongly dependent on the strength  
874 of selection against alleles driving BGS, but misspecification of the BGS DFE could result in slight biases in  
875 the weak and strong components of  $\alpha$  that are similar in magnitude to misspecification of the demographic  
876 model (Figs. S7&S8). Lastly, for each of the BGS DFEs that we considered, we checked explicitly that purely  
877 non-adaptive simulations could not fit the data. We took the subset of simulated summary statistics that  
878 approximately match the empirical  $\alpha(x)$  data at low frequency (*i.e.*, fall within 0.1 of the lowest-frequency  
879 data point) and additionally have very low adaptation (simulated  $\alpha < 0.01$ ). We plot these summary statistics  
880 along with the real data (Fig. S15). The simulated summary statistics fall below the real data at all values of  
881  $x$  at high frequency.

882 We also supposed that biased gene conversion (BGC) could be a confounder in our results. BGC can mimic  
883 positive selection by favoring the fixation of weak to strong mutations (87). We therefore recomputed  $\alpha(x)$   
884 using the 661 TGP samples after removing all the weak to strong mutations and fixations from the dataset.  
885 We find that the empirical  $\alpha(x)$  curve is not substantially affected by the removal of weak to strong sites at  
886 frequencies that we use for ABC (Fig. S5), suggesting that BGC is unlikely to affect our inferences.

887 In response to a suggestion by multiple reviewers, we also considered the impact that selection against  
888 synonymous alleles might have on our results. Recent studies have suggested that synonymous alleles are  
889 likely to be subject to weak negative selection (62, 88), which would violate an assumption of the MK test

890 framework. We tested the robustness of our results to this assumption by calculating the analytical expectation  
891 of  $\alpha(x)$  curves using a DFE over synonymous alleles that mimics recently inferred distributions from human  
892 genomic data. In particular, Huang & Siepel found that 70.5% of mutations were effectively neutral, while  
893 26% were moderately deleterious and 3.5% were strongly deleterious (62). We modeled this by mixing neutral  
894 alleles (70% of alleles) with a Gamma distribution inferred from conserved non-coding sites (86) – under this  
895 distribution (gamma parameters  $a = 0.0415$  and  $b = 0.00515$ , which has a mean value of  $\frac{a}{b} = \overline{2Ns} = -8.1$ ) 27%  
896 of alleles are weakly or moderately deleterious ( $|2Ns| < 10$ ) and 3% are strongly deleterious ( $|2Ns| > 10$ ).  
897 We also considered an *ad hoc* distribution with gamma parameters  $a = 0.1$  and  $b = 0.1$ , which has mean  
898  $\frac{a}{b} = \overline{2Ns} = -1$  and 29% weakly deleterious alleles and 1% strongly deleterious alleles – we made this choice  
899 since weakly deleterious alleles are more likely to be problematic for the MK framework, due to their potential  
900 to segregate for long times. Our calculations proceed by simply replacing the neutral terms in eqn. 11 with a  
901 mixture of neutral and deleterious distributions.

902 In Fig. S17, we show  $\alpha(x)$  summary statistics for these synonymous DFEs as compared to purely neutral  
903 alleles, which differ only subtly from each other. Crucially, when adaptation is absent, selection on synonymous  
904 alleles does not induce false adaptation signals (Fig. S18). The results of these calculations suggest that  
905 selection against synonymous alleles would have to differ substantially from current estimates in order to  
906 strongly affect our inference. In practice, cryptic selection against synonymous alleles may affect inference  
907 through the application of non-equilibrium demographic models, which are often inferred from synonymous  
908 alleles or other putatively neutral variants. Multiple studies have now found that demographic inference can be  
909 biased by linked selection or direct selection (23, 59, 60, 83, 89). More work will be needed to better understand  
910 how such inference errors will affect adaptation rate estimation in the MK framework.

911 Lastly, we considered the impact that misspecification of the strength of positive selection for alleles in  
912 the strongly-beneficial and weakly-beneficial categories might have on inference. We performed analytical  
913 calculations for a variety of selection coefficients to compare their  $\alpha(x)$  summary statistics. For strong alpha,  
914 there is almost no difference in the computed summary statistics in the absence of BGS and a small difference  
915 when BGS is strong (Fig. S16). This is the expected behavior, since strongly-beneficial alleles rarely contribute  
916 to segregating polymorphism and are only very weakly affected by BGS. For weak alpha, there are small  
917 differences in the values of the summary statistics for each of the  $\alpha(x)$  curves when BGS is absent – when  
918 BGS is strong most adaptive alleles are removed and the difference between different selection coefficients  
919 is diminished. This suggests that while strongly- and weakly-beneficial alleles have qualitatively different  
920 behaviors, we will have little power to infer the full DFE over beneficial alleles from these summary statistics.  
921 This does not preclude the possibility that more complex DFEs could also fit the summary statistics (see  
922 Discussion section in main text).

## 923 Genetic draft

924 Our modeling uses a diffusion approximation to dynamics of allele frequency shifts that accounts for background  
925 selection but not draft. If genetic draft (*i.e.*, the impact of linked positive selection on the frequency trajectories  
926 of linked alleles) also drives systematic variation in diversity genome-wide, then this approximation may break  
927 and invalidate some of the assumptions of our modeling (23).

928 To test the sensitivity of our results to genetic draft, we compared simulations with and without genetic  
929 draft to our theory for a range of selection strengths and rates. We simulated a gene under simultaneous  
930 negative and positive selection, flanked by 1 MB sequences. We compared models with and without BGS,  
931 and with and without draft, for a range of parameter values. We set  $\alpha = 0.4$  within the gene, and supposed  
932 that 5% of the flanking sequence was a potential target for positive selection that was both as strong and as  
933 frequent as that within the gene.

934 Consistent with earlier results (23), we find that draft can decrease  $\alpha$ , likely by increasing the rate of fixation  
935 of weakly deleterious alleles and/or interference between strongly-beneficial alleles (56, 57). However, even in  
936 the extreme scenario where adaptation is driven by very strongly advantageous alleles with  $2Ns = 2000$  and  
937  $\alpha = 0.4$ , we observe only a modest departure from the expectation in the absence of draft at the frequencies  
938 that we use in inference, all but one of which are below 37% frequency (Fig. S4). This suggests that our  
939 inference should be only modestly affected by draft, and only in regions of the genome experiencing strong,  
940 recurrent sweeps.

## 941 Simulations for demographic model misspecification

942 We tested the impact of demographic model misspecification by sampling “worst-case” parameters from the  
943 95% confidence interval of a previous study that fit a maximum-likelihood demographic model to TGP se-  
944 quences (85). The maximum likelihood estimates from this model for the ancestral human population size  
945 and expanded population size are  $N_A = 7,300$  and  $N_{AF} = 12,300$ , respectively. We supposed that the largest  
946 possible expansion would correspond to the 2.5% quantile estimate of  $N_A$  and the 97.5% quantile estimate of  
947  $N_{AF}$  ( $\frac{13,900}{4,400} = 3.15$ ), while the smallest possible expansion would correspond to the 97.5% quantile estimate of  
948  $N_A$  and 2.5% quantile estimate of  $N_{AF}$  ( $\frac{11,500}{10,100} = 1.13$ ). We then ran simulations under our model, sampling  
949 parameters from the same prior distributions as described above, and generated summary statistics. We then  
950 attempted to infer the parameters that were used to generate the summary statistics using our misspecified  
951 demographic model. Results of this experiment are shown in Fig. S7 & Fig. S8, and are described in the main  
952 text.

953 **Supplemental figures**

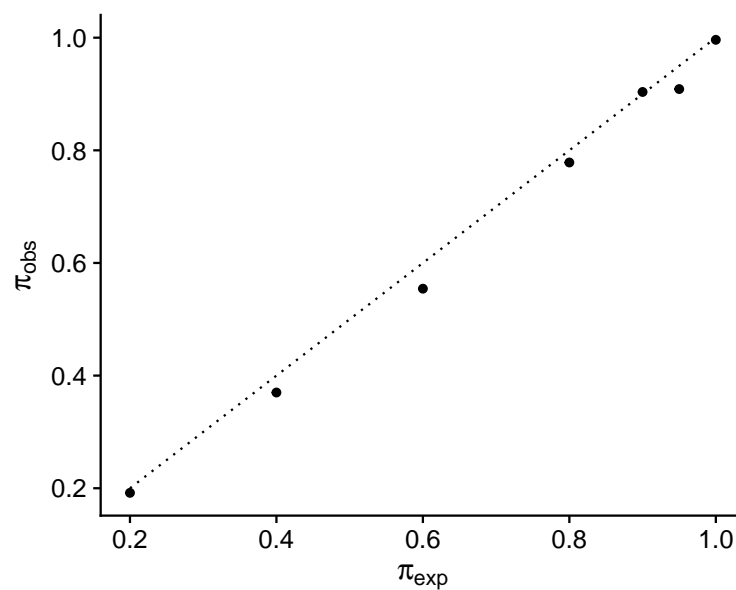

Figure S1: Simulated ( $\pi_{\text{obs}}$ ) vs expected ( $\pi_{\text{exp}}$ ) nucleotide diversity for simulations performed in SFS\_CODE. The expected value was calculated using the model of Hudson & Kaplan (68).

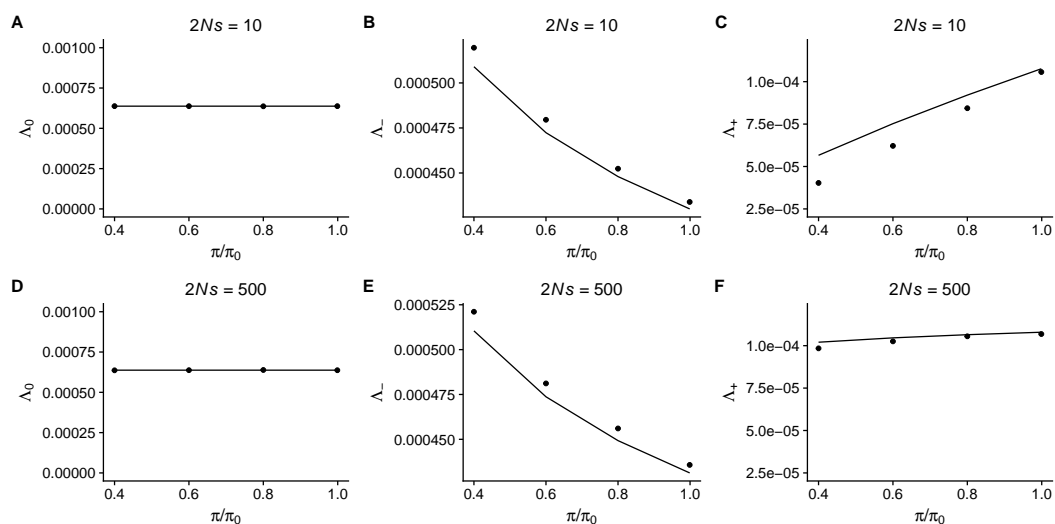

Figure S2: Simulated (points) and expected (lines) fixation rates for neutral, negatively selected, and positively selected alleles. Eqns. for the expected fixation rates are given in the supplemental text. The top row represents results in the context of weakly-beneficial adaptation ( $2Ns = 10$ ), while the bottom row represents strongly-beneficial adaptation ( $2Ns = 500$ ).

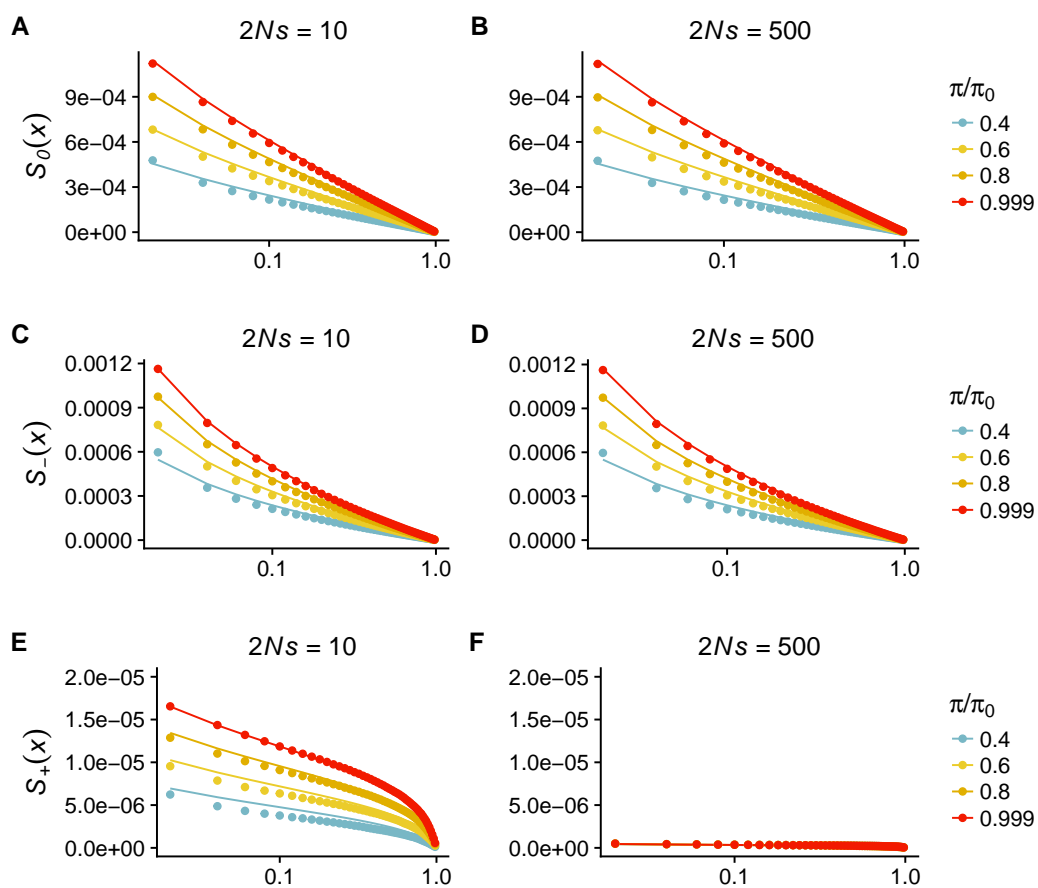

Figure S3: Simulated (points) and expected (lines) frequency spectra for neutral, negatively selected, and positively selected alleles.  $S(x)$  is the number of alleles above frequency  $x$ .



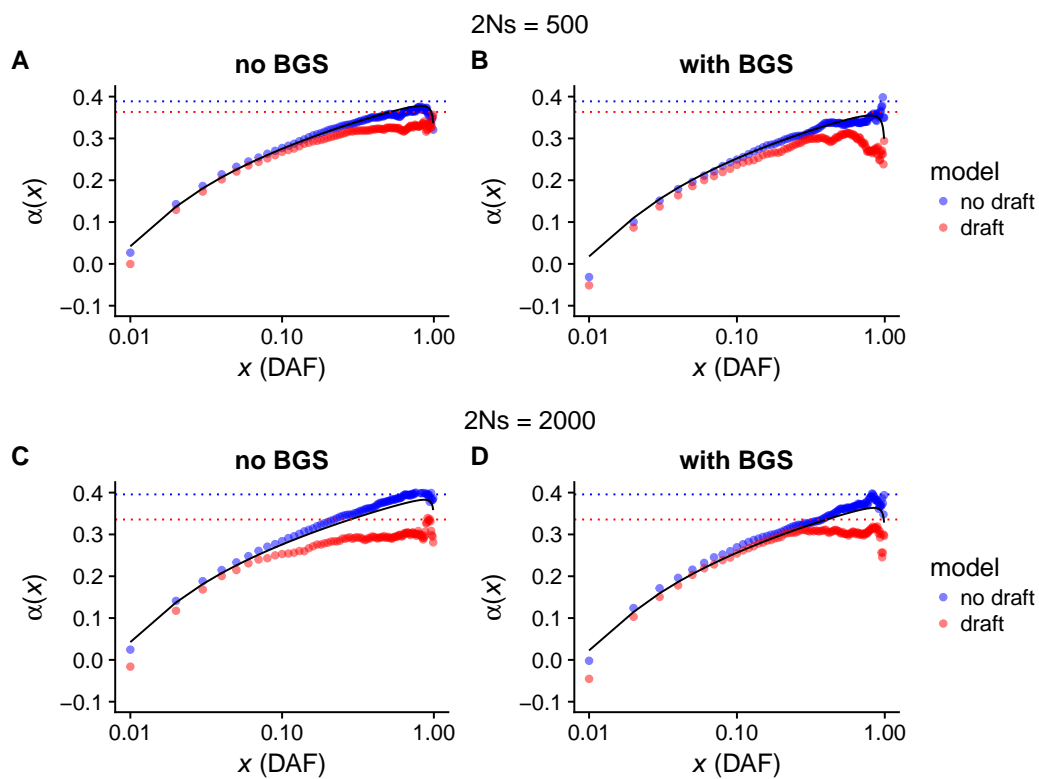

Figure S4: Comparison of simulations with and without genetic draft. In all simulations we set  $\alpha = 0.4$ , and suppose that 5% of the sequence in the 1MB flanking a gene is subject to recurrent sweeps. The black line shows the theoretical expectation from eqn. 11.

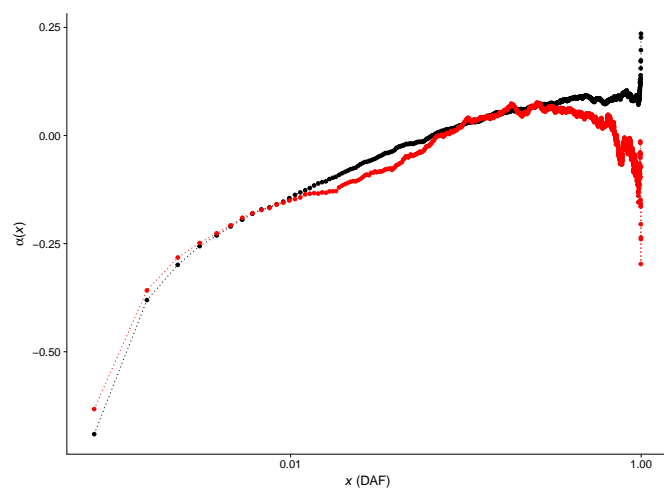

Figure S5: Comparison of  $\alpha(x)$  computed from TGP samples for all sites (black) and with weak to strong sites removed (red).

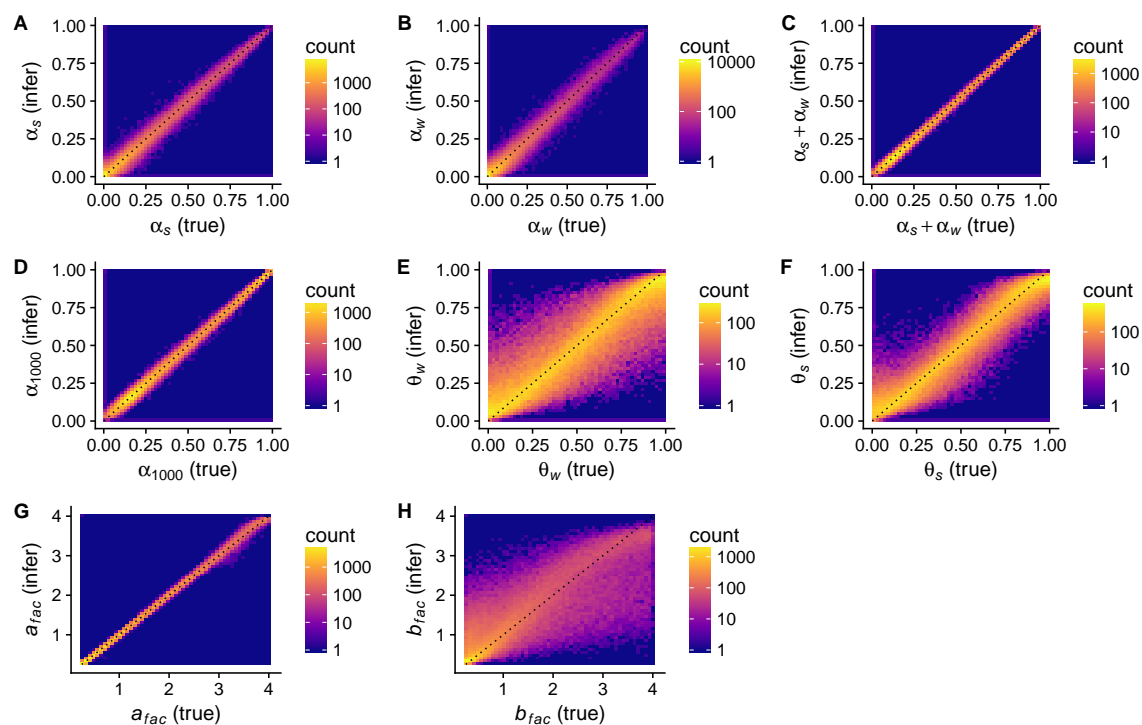

Figure S6: Performance of our parameter estimation for all of parameters and quantities that we infer. In each panel, the true parameter value is plotted on the  $x$ -axis, while the inferred value is plotted on the  $y$ . The diagonal is plotted as a dashed black line. The inferred value is summarized as the mean of the posterior distribution. Each plot contains 100,000 simulations.

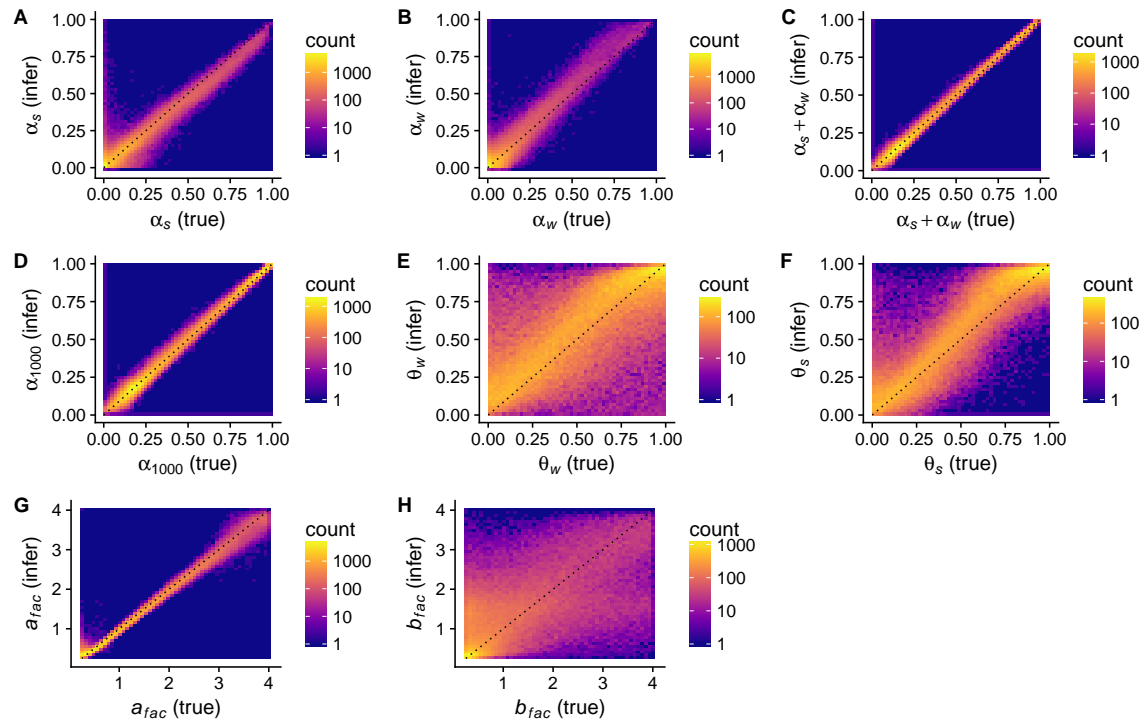

Figure S7: Performance of our parameter estimation for all of parameters and quantities that we infer, in the case when the true model has an ancestral expansion event that is  $\approx 2$  larger than the model used in the inference procedure. In each panel, the true parameter value is plotted on the  $x$ -axis, while the inferred value is plotted on the  $y$ . The diagonal is plotted as a dashed black line. The inferred value is summarized as the mean of the posterior distribution. Each plot contains 100,000 simulations.

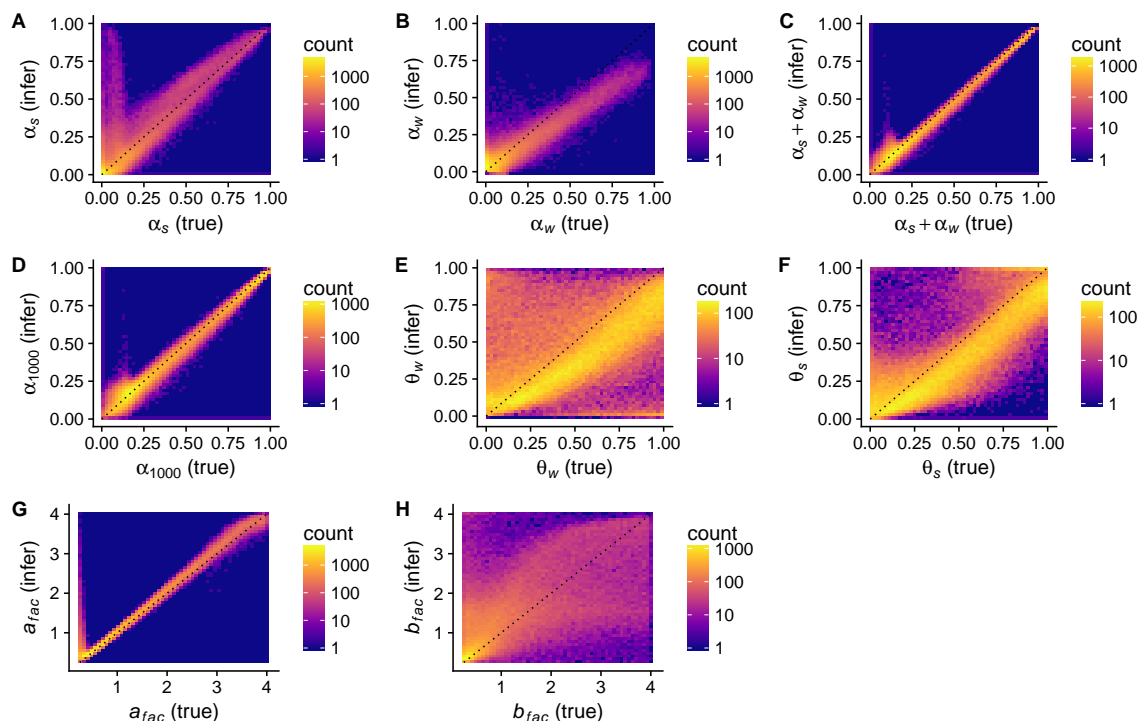

Figure S8: Performance of our parameter estimation for all of parameters and quantities that we infer, in the case when the true model has an ancestral expansion event that is  $\approx \frac{1}{2}$  as large as the model used in the inference procedure. In each panel, the true parameter value is plotted on the  $x$ -axis, while the inferred value is plotted on the  $y$ . The diagonal is plotted as a dashed black line. The inferred value is summarized as the mean of the posterior distribution. Each plot contains 100,000 simulations.

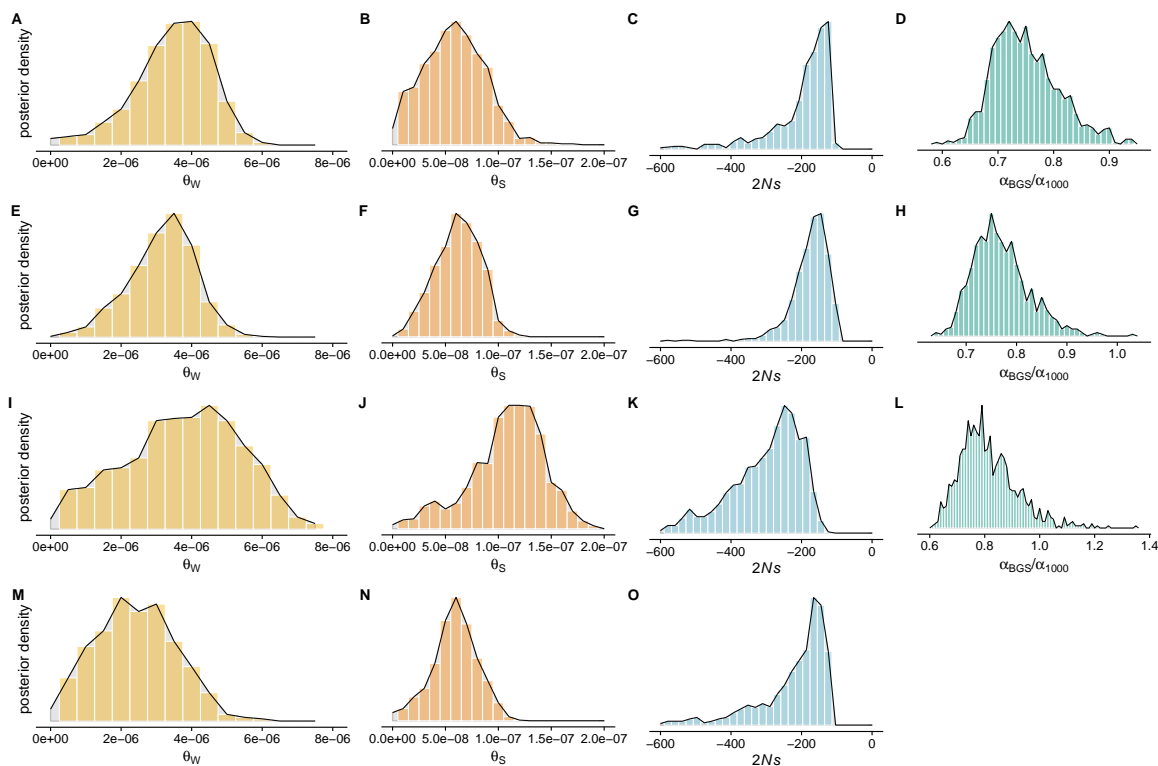

Figure S9: A-D. Posteriors for  $\theta_W$ ,  $\theta_S$ , the mean strength of negative selection ( $2Ns$ ), and the ratio of  $\alpha_{BGS}$  (the estimated value of  $\alpha$  in humans after accounting for BGS) to  $\alpha_{1000}$  (the value of  $\alpha$  for regions of the genome with  $B = 1000$ , *i.e.*, regions unaffected by BGS) as predicted by our model. E-H: The same quantities, as inferred using only genes that were not classified as VIPs. I-L: The same quantities, as inferred using only genes that were classified as VIPs. N-O: The same quantities, as inferred using only genes with  $B < 875$ . We do not infer  $\alpha_{BGS}/\alpha_{1000}$  in this row because genes with  $B \approx 1$  are not included in this analysis.

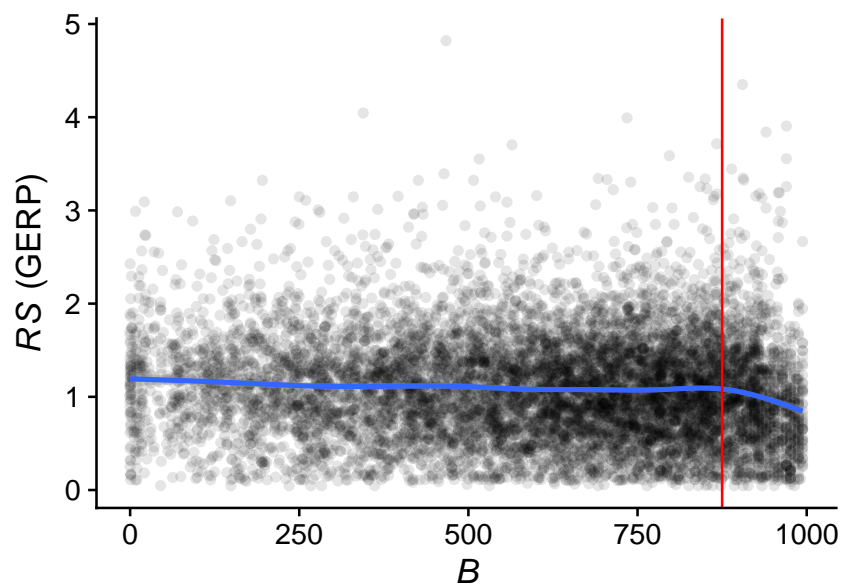

Figure S10: The relationship between BGS ( $B$ ) and average sequence conservation ( $RS$ ) for  $\approx 10,000$  genes for which we were able to obtain estimates of both quantities. The blue line is fit to the data using `geom_smooth` in `ggplot2`, while the red line is plotted at  $B = 875$ . Most of the negative correlation between  $B$  and  $RS$  is driven by alleles with  $B > 875$ . Note that  $B$  is defined in previous work (34), and is equivalent to  $1000 \times \frac{\pi}{\pi_0}$ .

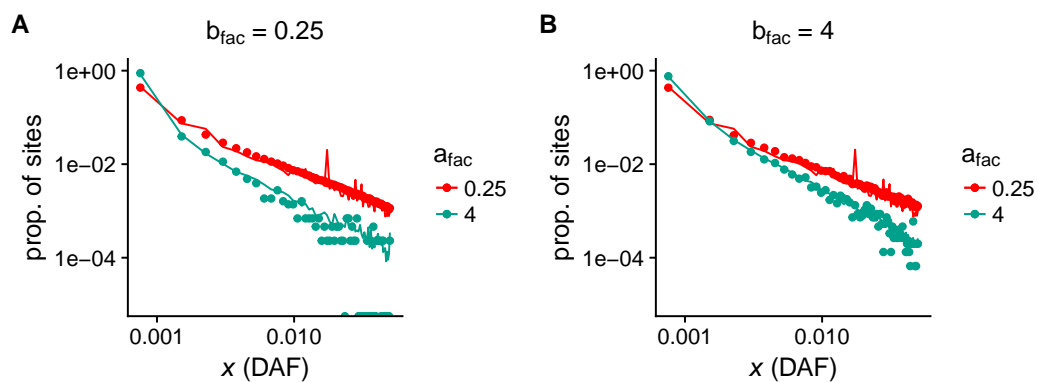

Figure S11: We compare simulated frequency spectra obtained with SFS\_CODE (points) to frequency spectra that we obtained using our resampling-based approach (lines) for a range of parameter values corresponding to the strength of negative selection. We observe good agreement between the approaches. One downside of the resampling based approach is that stochastic fluctuations in the dataset from which resampling is performed are replicated across different samples (*e.g.*, the spike at  $\approx 0.015$  is replicated in both A and B).



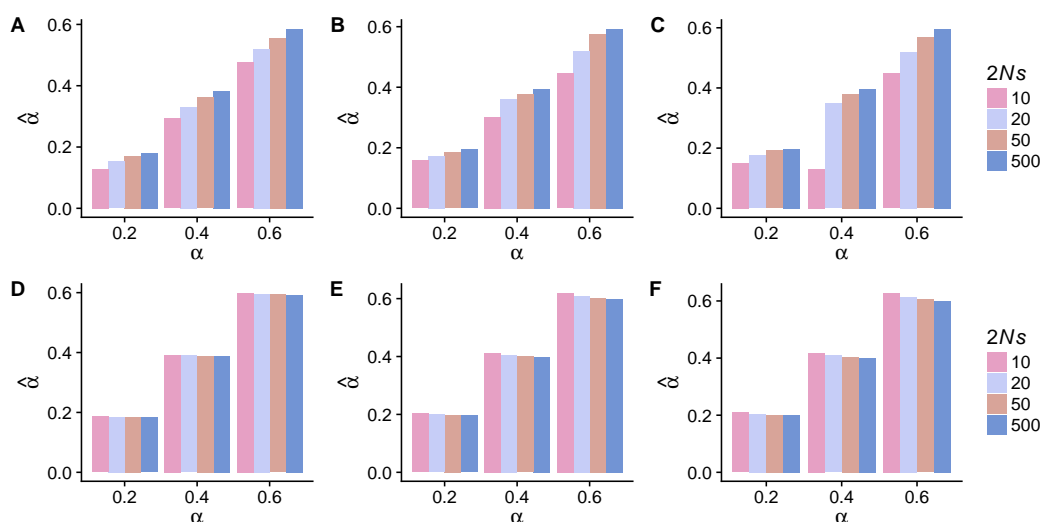

Figure S12: We plot estimates of adaptation rate ( $\hat{\alpha}$ ) using asymptotic-MK as a function of true  $\alpha$  for a range of  $2Ns$  values of adaptive alleles (colors) and a range of deleterious selection coefficient distributions (each panel is a different distribution of deleterious effects). A&D correspond to the distribution of deleterious effects inferred in (37) (which has a mean value of  $2Ns = -457$ ), while B&E have a mean value of  $2Ns = -114$  and C&F have mean  $2Ns = -22$ . In A-C, all alleles are used in the estimation procedure, while in D-F we exclude positively selected alleles from the calculation.

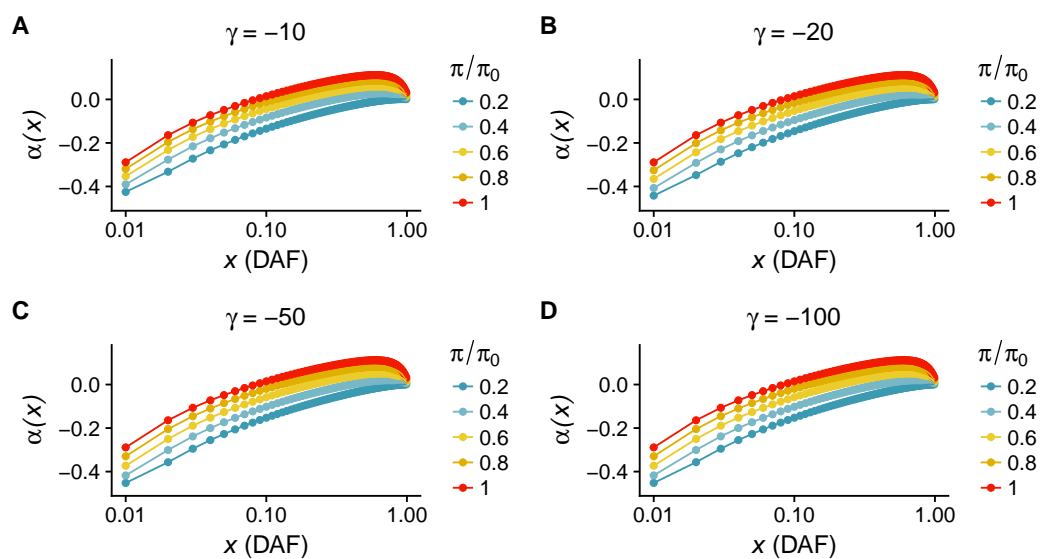

Figure S13:  $\alpha(x)$  as a function of DAF for a range of selection strengths ( $\gamma$ ) on alleles driving BGS. Each curve represents a different value of  $\frac{\pi}{\pi_0}$ . In each panel, the strength of selection on adaptive alleles is  $2Ns = 10$ .

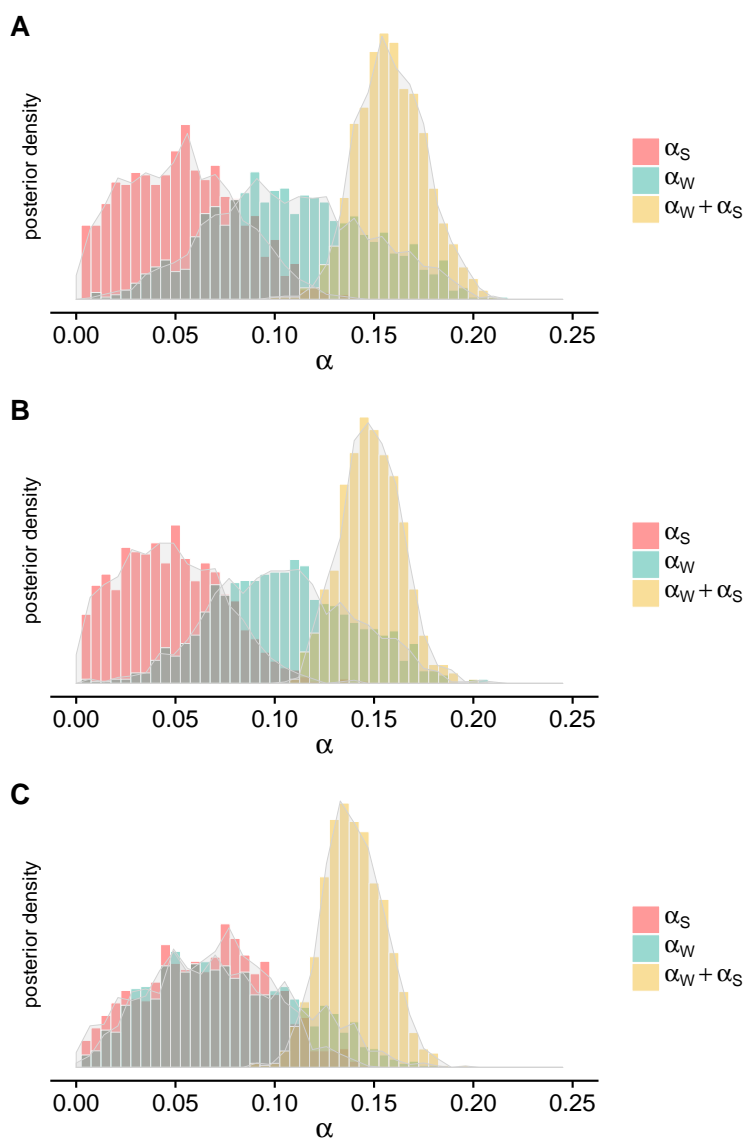

Figure S14: Inferred posterior distributions of  $\alpha_S$ ,  $\alpha_W$ , and  $\alpha_S + \alpha_W$  for three different DFEs of alleles driving BGS. In A, alleles in flanking regions around genes have  $2Ns = -10$ , in B  $2Ns = -500$ , and in C  $2Ns$  is a gamma-distributed mixture of weakly deleterious and strongly deleterious alleles (37).

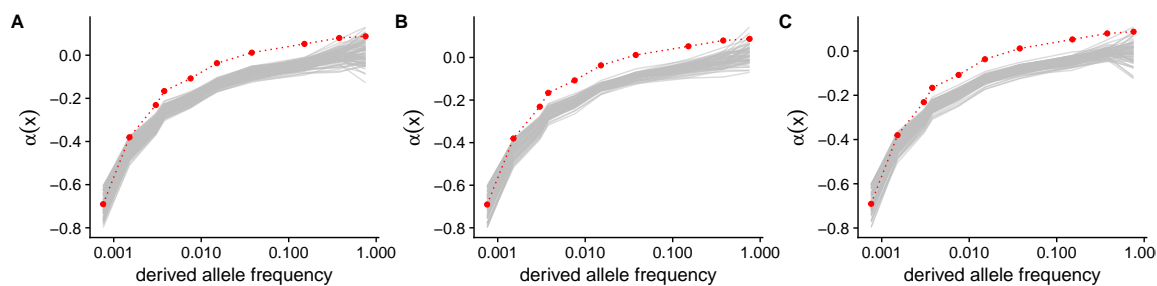

Figure S15: Summary statistics for simulations with very low adaptation ( $\alpha < 0.01$ ) as compared to the observed data for three different DFEs of alleles driving BGS. In A, alleles in flanking regions around genes have  $2Ns = -10$ , in B  $2Ns = -500$ , and in C  $2Ns$  is a gamma-distributed mixture of weakly deleterious and strongly deleterious alleles (37).

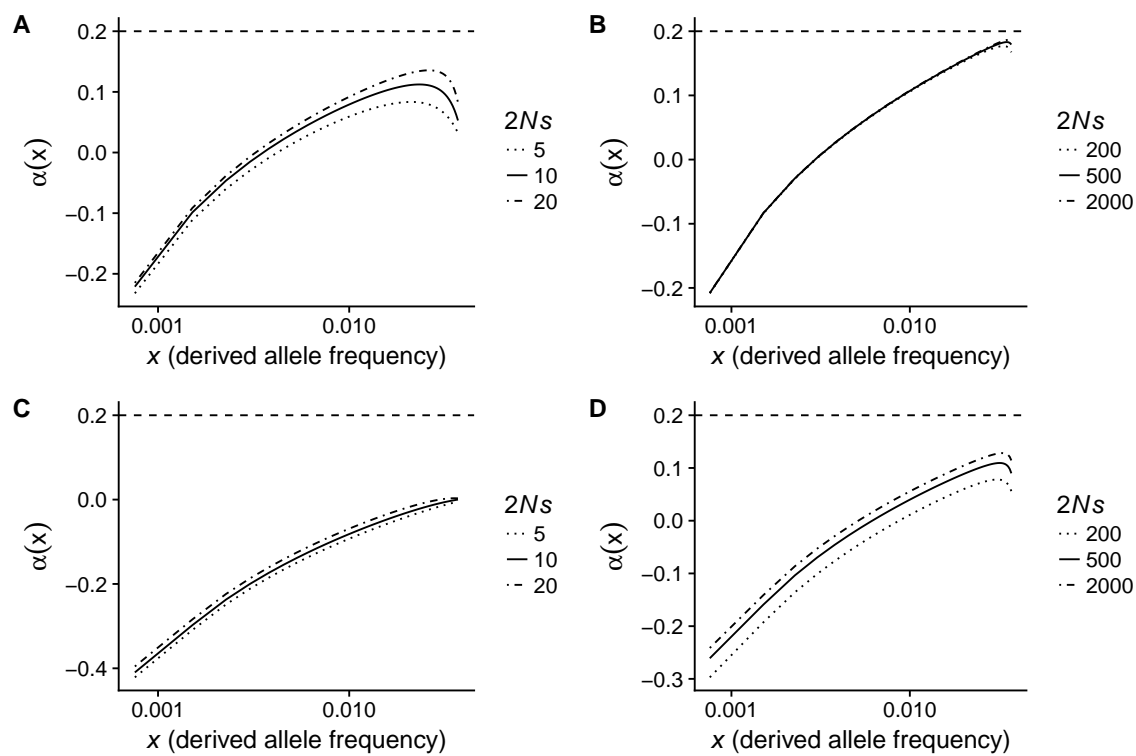

Figure S16: Comparison of analytical approximations to  $\alpha(x)$  summary statistics for a range of  $2Ns$  values at adaptive alleles. The dashed line at  $\alpha(x) = 0.2$  represents the true  $\alpha$  in the absence of BGS. In A&B, there is no BGS, while  $\frac{\pi}{\pi_0} = 0.2$  in C&D.

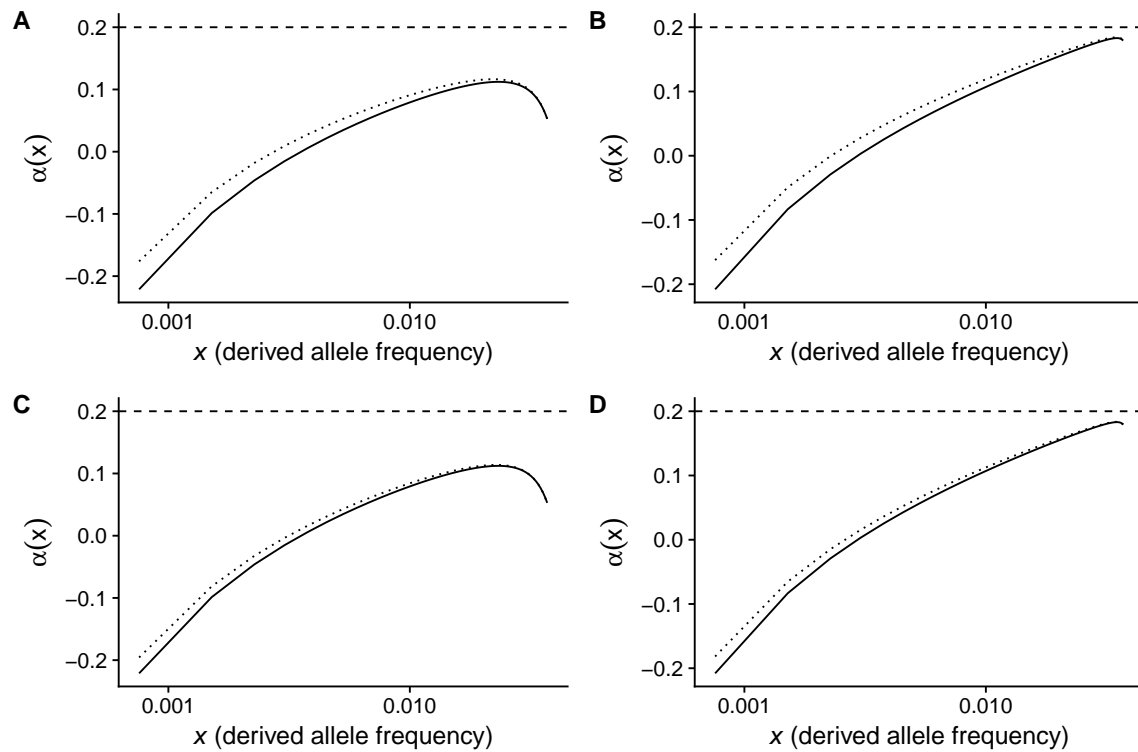

Figure S17: Analytical approximation to  $\alpha(x)$  summary statistics when selection acts on synonymous alleles (dotted line) or does not act on synonymous alleles (solid line). In all panels, the true rate of adaptation  $\alpha = 0.2$  and 70% of synonymous alleles are assumed to be neutral. A&B: 29% of synonymous alleles are moderately deleterious and 1% are strongly deleterious. C&D 27% of synonymous alleles are moderately deleterious and 3% are strongly deleterious. In the left column,  $2Ns = 10$  for adaptive alleles, and in the right column  $2Ns = 500$  for adaptive alleles. These DFEs for synonymous alleles were motivated by Huang & Siepel (62), who estimated the DFE of synonymous alleles from human genomic data (62).

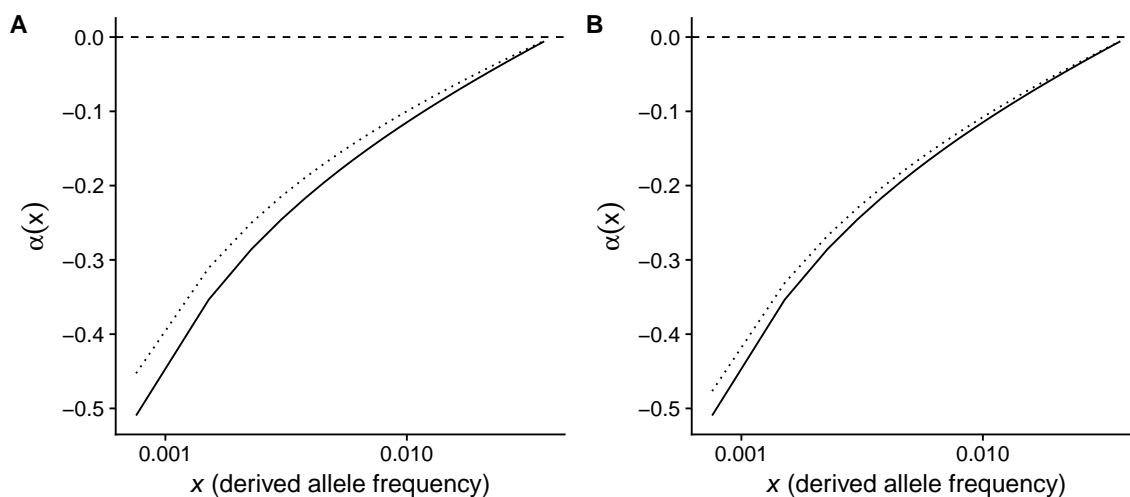

Figure S18: Analytical approximation to  $\alpha(x)$  summary statistics when selection does (dotted line) or does not (solid line) act on synonymous alleles. In both panels, the true rate of adaptation  $\alpha = 0.0$  and 70% of synonymous alleles are assumed to be neutral. A: 29% of synonymous alleles are moderately deleterious and 1% are strongly deleterious. B: 27% of synonymous alleles are moderately deleterious and 3% are strongly deleterious. These DFEs were motivated by an attempt to qualitatively match the distribution of Huang & Siepel, who estimated the DFE of synonymous alleles from human genomic data (62).



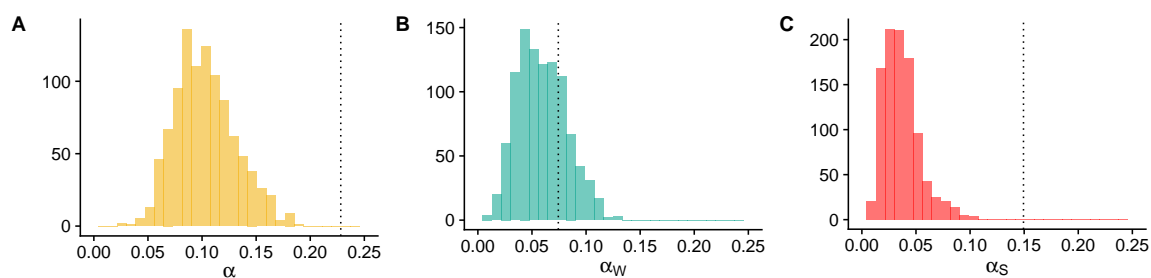

Figure S19: Median posterior estimates of  $\alpha$ ,  $\alpha_W$ , and  $\alpha_S$  for both VIPs (black dashed lines) and 1,000 independent sets of genes sampled from non-VIPs to approximately match VIPs for 13 potential confounding variables (histograms). For the set of VIPs that we identified, we built an equal-sized control set of non-VIPs that that has the same overall average values for 13 factors (DS, PN, PS, GC content, recombination rate, coding sequence length, average expression across 53 GTEx tissues, average GTEx expression in testis, average GTEx expression in lymphocytes, the number of protein-protein interactions, McVickers B for background selection, the coding sequence density, the overall density of PhastCons conserved elements). We randomly sampled non-VIPs such that each of the 13 factors does not depart on average by more than  $\pm 5\%$  of their average for VIPs.

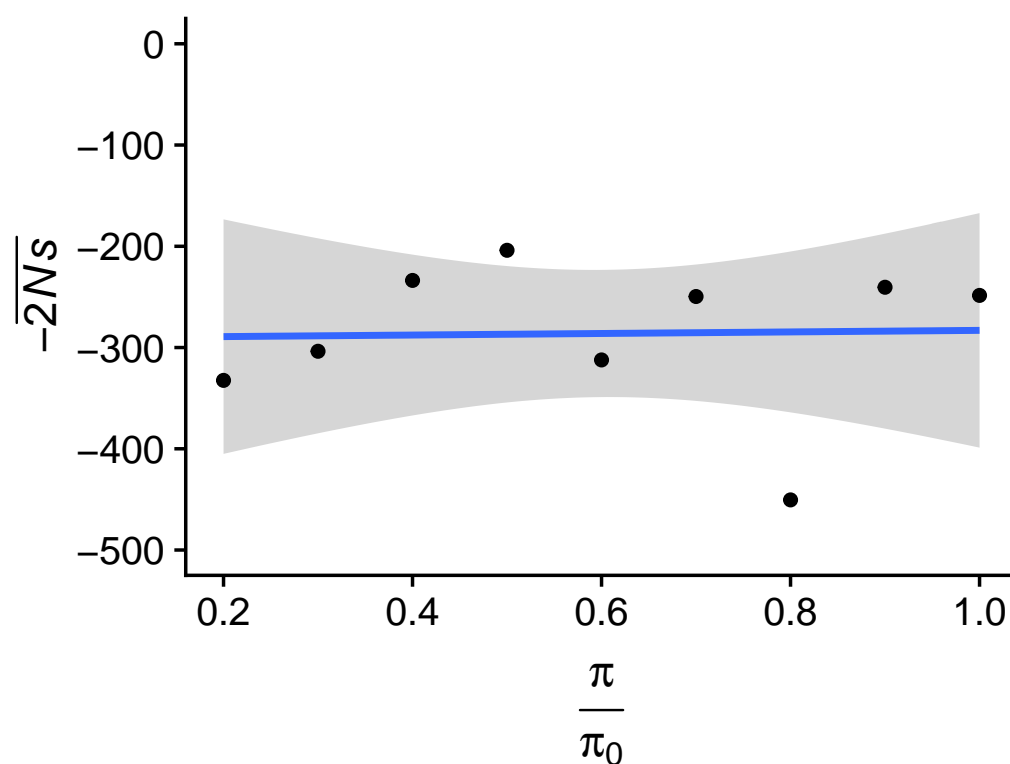

Figure S20: Posterior estimates of mean strength of negative selection ( $-2\bar{N}s$ ) against deleterious nonsynonymous alleles as a function of estimated BGS strength. The line shows the best fit linear regression curve as determined by the method `geom_smooth` in the package `ggplot2`. The estimated correlation coefficient is  $\rho = 0.028$ .
